# Supplementary material for: N-2-Selective gold-catalyzed alkylation of 1-sulfonyl-1,2,3-trizoles
Source: Royal Society of Chemistry journal article supplement (doi:10.1039/c6ra26521a), 2017-01-01

## Supporting Information

for

### **N-2-Selective gold-catalyzed alkylation of 1-sulfonyl-1,2,3-triazoles**

Ting Ma, Chenyang Sun, Xiao Yuan, Xiaoxiao Li\* and Zhigang Zhao\*

College of Chemistry and Environmental Protection Engineering,

Southwest University for Nationalities, Chengdu 610041, PR China

lixiaoxiao.2005@163.com    zzg63129@163.com

#### **Table of contents**

|                                                            |         |
|------------------------------------------------------------|---------|
| 1. General considerations and experimental procedures..... | S2      |
| 2. Analytical Data.....                                    | S3-S10  |
| 3. Deuterium-Labeling Experiment Result.....               | S11     |
| 4. References .....                                        | S12     |
| 5. NMR Spectra for <b>3a – 3l</b> .....                    | S13-S24 |
| 6. NMR Spectra for <b>4b – 4k</b> .....                    | S25-S34 |

## 1. General considerations

All reactions were performed using Schlenk tubes, septa, and syringes without protection of nitrogen. THF, toluene and DCM, DCE were freshly distilled over sodium/benzophenone and calcium hydride, respectively. Commercial reagents were used as supplied or were purified by standard techniques where necessary. Column chromatography was performed using Qingdao Haiyang Chemical Co., Ltd silica gel (200–300 mesh) with the appropriate solvent system, as determined by TLC analysis (Qingdao Haiyang Chemical Co., Ltd, silica gel F254) using UV light and  $\text{KMnO}_4$  stain to visualize the reaction components. Melting points were determined using a WRS-1B digital melting point instrument. IR spectra were recorded on a Nicoletisso FTIR spectrometer using KBr disks. Unless otherwise noted, nuclear magnetic resonance spectra were recorded at room temperature on an Agilent 400 MHz spectrometer using  $\text{CDCl}_3$  as the solvent and TMS as the internal reference. Chemical shifts for  $^{13}\text{C}$  NMR spectra were recorded in parts per million relative to tetramethylsilane using the central peak of deuteriochloroform (77.0 ppm) as the internal standard. HRMS was performed using a Bruker Daltonics Bio TOF mass spectrometer.

1-Sulfonyl-1,2,3-trizoles **1a-1n** were prepared according to the published methods.<sup>1</sup> Vinyl ethers were obtained commercially and used without further purification.

### **General procedure for N-2-Selective gold-catalyzed alkylation of 4-phenyl-1-sulfonyl-1,2,3-trizole **1a** with vinyl ether **2a**.**

To a Schlenk tube charged with nitrogen was added  $\text{IPrAuCl/AgNTf}_2$  (5 mol%) in dry DCE (3 mL). After three minutes, 4-phenyl-1-sulfonyl-1,2,3-trizole **1a** (0.5 mmol), vinyl ether **2a** (2.5 mmol) and  $\text{H}_2\text{O}$  (1.0 mmol) were added to the reaction. Then the reaction mixture was stirred at 80 °C for 6 h until complete consumption of starting material as monitored by TLC. Concentration of the reaction mixture in vacuo followed by purification through flash chromatography on silica gel column (hexane/EtOAc = 30/1) afforded **3a** (112.8 mg, 98% yield) as yellow oil liquid.

## 2. Analytical Data

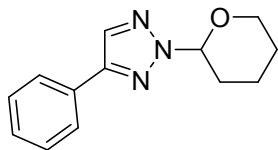

### 4-phenyl-2-(tetrahydro-2H-pyran-2-yl)-2H-1,2,3-triazole (**3a**)

Yellow oil liquid; yield, 98%; IR (neat) 3475, 2951, 1611, 1391, 1063  $\text{cm}^{-1}$ ;  $^1\text{H}$  NMR (400 MHz,  $\text{CDCl}_3$ )  $\delta$  7.92 (s, 1H), 7.82 (d,  $J = 7.2$  Hz, 2H), 7.42 (t,  $J = 7.4$  Hz, 2H), 7.35 (t,  $J = 7.3$  Hz, 1H), 5.75 (dd,  $J = 9.1, 2.6$  Hz, 1H), 4.07 (dt,  $J = 7.1, 3.0$  Hz, 1H), 3.79 – 3.73 (m, 1H), 2.52 – 2.45 (m, 1H), 2.17 – 2.09 (m, 2H), 1.78 – 1.72 (m, 2H), 1.68 – 1.64 (m, 1H).  $^{13}\text{C}$  NMR (100 MHz,  $\text{CDCl}_3$ )  $\delta$  131.59, 130.13, 128.79, 128.57, 126.10, 109.99, 89.13, 67.50, 29.40, 24.78, 21.85. HRMS (ESI) calcd for  $\text{C}_{13}\text{H}_{16}\text{N}_3\text{O}^+$   $[\text{M}+\text{H}]^+$  230.1288; found, 230.1287.

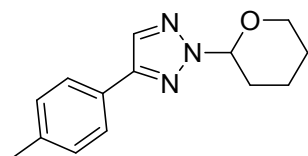

### 2-(tetrahydro-2H-pyran-2-yl)-4-(*p*-tolyl)-2H-1,2,3-triazole (**3b**)

Colorless oil liquid; yield, 74%; IR (neat) 3466, 2955, 1645, 1398, 1070  $\text{cm}^{-1}$ ;  $^1\text{H}$  NMR (400 MHz,  $\text{CDCl}_3$ )  $\delta$  7.88 (s, 1H), 7.71 (d,  $J = 7.9$  Hz, 2H), 7.22 (d,  $J = 7.8$  Hz, 2H), 5.73 (dd,  $J = 9.1, 1.8$  Hz, 1H), 4.08 – 4.05 (m, 1H), 3.78 – 3.72 (m, 1H), 2.51 – 2.43 (m, 1H), 2.37 (s, 3H), 2.16 – 2.06 (m, 2H), 1.77 – 1.68 (m, 2H), 1.67 – 1.61 (m, 1H).  $^{13}\text{C}$  NMR (100 MHz,  $\text{CDCl}_3$ )  $\delta$  148.11, 138.38, 131.32, 129.39, 127.21, 125.91, 89.00, 67.43, 29.33, 24.71, 21.81, 21.23. HRMS (ESI) calcd for  $\text{C}_{14}\text{H}_{18}\text{N}_3\text{O}^+$   $[\text{M}+\text{H}]^+$  244.1444; found, 244.1443.

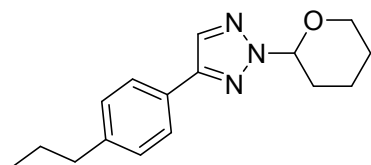

### 4-(4-propylphenyl)-2-(tetrahydro-2H-pyran-2-yl)-2H-1,2,3-triazole (**3c**)

Yellow oil liquid; yield, 84%; IR (neat) 3463, 2954, 1645, 1382, 1057  $\text{cm}^{-1}$ ;  $^1\text{H}$  NMR (400 MHz,  $\text{CDCl}_3$ )  $\delta$  7.89 (s, 1H), 7.73 (d,  $J = 7.6$  Hz, 2H), 7.23 (d,  $J = 7.7$  Hz, 2H), 5.74 (d,  $J = 8.5$  Hz, 1H), 4.07 (d,  $J = 11.5$  Hz, 1H), 3.76 (t,  $J = 10.4$  Hz, 1H), 2.61 (t,  $J = 7.6$  Hz, 2H), 2.52 – 2.44 (m, 1H), 2.16 – 2.09 (m, 2H), 1.78 – 1.71 (m, 2H), 1.69 – 1.63 (m, 3H), 0.95 (t,  $J = 7.3$  Hz, 3H).  $^{13}\text{C}$  NMR (100 MHz,  $\text{CDCl}_3$ )  $\delta$  143.29, 131.43, 128.89, 127.55, 126.00, 109.99, 89.07, 67.47, 37.81, 29.40, 24.79, 24.44, 21.86, 13.77. HRMS (ESI) calcd for  $\text{C}_{16}\text{H}_{22}\text{N}_3\text{O}^+$   $[\text{M}+\text{H}]^+$  272.1757; found, 272.1758.

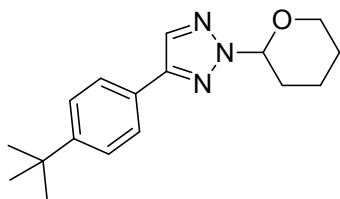

4-(4-(*tert*-butyl)phenyl)-2-(tetrahydro-2*H*-pyran-2-yl)-2*H*-1,2,3-triazole (**3d**)

Colorless oil liquid; yield, 86%; IR (neat) 3470, 2970, 1644, 1490, 1092  $\text{cm}^{-1}$ ;  $^1\text{H}$  NMR (400 MHz,  $\text{CDCl}_3$ )  $\delta$  7.89 (s, 1H), 7.74 (d,  $J = 7.9$  Hz, 2H), 7.44 (d,  $J = 7.9$  Hz, 2H), 5.74 (d,  $J = 9.1$  Hz, 1H), 4.08 – 4.05 (m, 1H), 3.78 – 3.73 (m, 1H), 2.53 – 2.44 (m, 1H), 2.14 – 2.08 (m, 2H), 1.74 – 1.71 (m, 2H), 1.66 – 1.64 (m, 1H), 1.34 (s, 9H).  $^{13}\text{C}$  NMR (100 MHz,  $\text{CDCl}_3$ )  $\delta$  151.62, 148.06, 131.43, 127.29, 125.80, 125.65, 89.00, 67.37, 34.62, 31.20, 29.35, 24.75, 21.79. HRMS (ESI) calcd for  $\text{C}_{17}\text{H}_{24}\text{N}_3\text{O}^+$   $[\text{M}+\text{H}]^+$  286.1914; found, 286.1914.

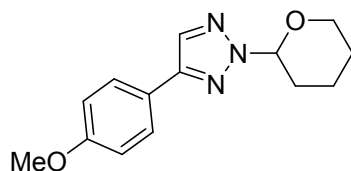

4-(4-methoxyphenyl)-2-(tetrahydro-2*H*-pyran-2-yl)-2*H*-1,2,3-triazole (**3e**)

Yellow oil liquid; yield, 91%; IR (neat) 3467, 2954, 1631, 1396, 1058  $\text{cm}^{-1}$ ;  $^1\text{H}$  NMR (400 MHz,  $\text{CDCl}_3$ )  $\delta$  7.84 (s, 1H), 7.75 (d,  $J = 8.4$  Hz, 2H), 6.95 (d,  $J = 8.4$  Hz, 2H), 5.72 (d,  $J = 8.6$  Hz, 1H), 4.09 – 4.06 (m, 1H), 3.84 (s, 3H), 3.78 – 3.73 (m, 1H), 2.52 – 2.44 (m, 1H), 2.15 – 2.08 (m, 2H), 1.76 – 1.72 (m, 2H), 1.66 – 1.65 (m, 1H).  $^{13}\text{C}$  NMR (100 MHz,  $\text{CDCl}_3$ )  $\delta$  159.88, 148.00, 131.08, 127.41, 122.81, 114.17, 89.04, 67.49, 55.28, 29.40, 24.78, 21.89. HRMS (ESI) calcd for  $\text{C}_{14}\text{H}_{18}\text{N}_3\text{O}_2^+$   $[\text{M}+\text{H}]^+$  260.1394; found, 260.1394.

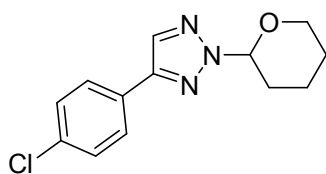

4-(4-chlorophenyl)-2-(tetrahydro-2*H*-pyran-2-yl)-2*H*-1,2,3-triazole (**3f**)

Yellow oil liquid; yield, 77%; IR (neat) 3475, 2971, 1645, 1393, 1093  $\text{cm}^{-1}$ ;  $^1\text{H}$  NMR (400 MHz,  $\text{CDCl}_3$ )  $\delta$  7.89 (s, 1H), 7.75 (d,  $J = 8.1$  Hz, 2H), 7.39 (d,  $J = 8.0$  Hz, 2H), 5.74 (d,  $J = 9.3$  Hz, 1H), 4.07 (d,  $J = 11.4$  Hz, 1H), 3.76 (t,  $J = 9.9$  Hz, 1H), 2.51 – 2.53 (m, 1H), 2.14 – 2.08 (m, 2H), 1.75 – 1.712 (m, 2H), 1.69 – 1.65 (m, 1H).  $^{13}\text{C}$  NMR (100 MHz,  $\text{CDCl}_3$ )  $\delta$  147.04, 134.30, 131.41, 128.94, 128.60, 127.27, 89.12, 67.43, 29.31, 24.69, 21.73. HRMS (ESI) calcd for  $\text{C}_{13}\text{H}_{15}\text{ClN}_3\text{O}^+$   $[\text{M}+\text{H}]^+$  264.0898; found, 264.0898.

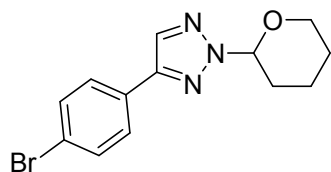

4-(4-bromophenyl)-2-(tetrahydro-2H-pyran-2-yl)-2H-1,2,3-triazole (**3g**)

Colorless oil liquid; yield, 57%; IR (neat) 3470, 2948, 1645, 1387, 1066  $\text{cm}^{-1}$ ;  $^1\text{H}$  NMR (400 MHz,  $\text{CDCl}_3$ )  $\delta$  7.90 (s, 1H), 7.69 (d,  $J$  = 8.5 Hz, 2H), 7.55 (d,  $J$  = 8.5 Hz, 2H), 5.74 (dd,  $J$  = 9.1, 2.6 Hz, 1H), 4.10 – 4.04 (m, 1H), 3.80 – 3.73 (m, 1H), 2.51 – 2.42 (m, 1H), 2.16 – 2.08 (m, 2H), 1.78 – 1.71 (m, 2H), 1.68 – 1.64 (m, 1H).  $^{13}\text{C}$  NMR (100 MHz,  $\text{CDCl}_3$ )  $\delta$  147.09, 131.92, 131.44, 129.09, 127.57, 122.53, 89.16, 67.46, 29.34, 24.72, 21.75. HRMS (ESI) calcd for  $\text{C}_{13}\text{H}_{15}\text{BrN}_3\text{O}^+$   $[\text{M}+\text{H}]^+$  308.0393; found, 308.0393.

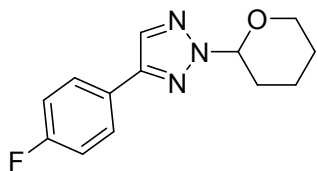

4-(4-fluorophenyl)-2-(tetrahydro-2H-pyran-2-yl)-2H-1,2,3-triazole (**3h**)

Colorless oil liquid; yield, 99%; IR (neat) 3477, 2959, 1617, 1397, 1094  $\text{cm}^{-1}$ ;  $^1\text{H}$  NMR (400 MHz,  $\text{CDCl}_3$ )  $\delta$  7.87 (s, 1H), 7.79 (dd,  $J$  = 8.0, 5.6 Hz, 2H), 7.11 (t,  $J$  = 8.5 Hz, 2H), 5.76 – 5.70 (m, 1H), 4.07 (d,  $J$  = 11.8 Hz, 1H), 3.78 – 3.73 (m, 1H), 2.51 – 2.42 (m, 1H), 2.16 – 2.07 (m, 2H), 1.78 – 1.71 (m, 2H), 1.70 – 1.64 (m, 1H).  $^{13}\text{C}$  NMR (100 MHz,  $\text{CDCl}_3$ )  $\delta$  164.81 (d,  $J$  = 246.5 Hz), 147.19, 131.22, 127.77 (d,  $J$  = 8.2 Hz), 126.28 (d,  $J$  = 3.2 Hz), 115.71 (d,  $J$  = 21.6 Hz), 89.05, 67.42, 29.29, 24.67, 21.75. HRMS (ESI) calcd for  $\text{C}_{13}\text{H}_{15}\text{FN}_3\text{O}^+$   $[\text{M}+\text{H}]^+$  248.1194; found, 248.1194.

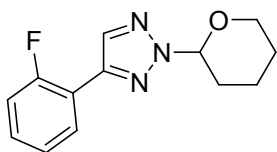

4-(2-fluorophenyl)-2-(tetrahydro-2H-pyran-2-yl)-2H-1,2,3-triazole (**3i**)

Colorless oil liquid; yield, 73%; IR (neat) 3466, 2955, 1645, 1390, 1071  $\text{cm}^{-1}$ ;  $^1\text{H}$  NMR (400 MHz,  $\text{CDCl}_3$ )  $\delta$  8.07 (d,  $J$  = 6.8 Hz, 2H), 7.37 – 7.28 (m, 1H), 7.21 (t,  $J$  = 7.5 Hz, 1H), 7.18 – 7.10 (m, 1H), 5.77 (d,  $J$  = 8.7 Hz, 1H), 4.08 (d,  $J$  = 11.3 Hz, 1H), 3.77 (t,  $J$  = 10.4 Hz, 1H), 2.53 – 2.46 (m, 1H), 2.13 (t,  $J$  = 11.2 Hz, 2H), 1.75 (s, 2H), 1.69 – 1.64 (m, 1H).  $^{13}\text{C}$  NMR (100 MHz,  $\text{CDCl}_3$ )  $\delta$  160.00 (d,  $J$  = 248.4 Hz), 142.65, 134.30 (d,  $J$  = 11.8 Hz), 129.86 (d,  $J$  = 8.4 Hz), 128.52 (d,  $J$  = 3.6 Hz), 124.40 (d,  $J$  = 3.4 Hz), 118.12 (d,  $J$  = 12.3 Hz), 115.94 (d,  $J$  = 21.5 Hz), 89.10, 67.40, 29.35, 24.74, 21.73. HRMS (ESI) calcd for  $\text{C}_{13}\text{H}_{15}\text{FN}_3\text{O}^+$   $[\text{M}+\text{H}]^+$  248.1194; found, 248.1193.

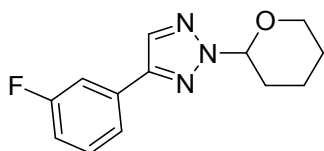

4-(3-fluorophenyl)-2-(tetrahydro-2H-pyran-2-yl)-2H-1,2,3-triazole (**3j**)

Colorless oil liquid; yield, 87%; IR (neat) 3484, 2957, 1595, 1399, 1063  $\text{cm}^{-1}$ ;  $^1\text{H}$  NMR (400 MHz,  $\text{CDCl}_3$ )  $\delta$  7.91 (s, 1H), 7.58 (d,  $J = 7.7$  Hz, 1H), 7.54 (d,  $J = 9.7$  Hz, 1H), 7.41 – 7.35 (m, 1H), 7.04 (td,  $J = 8.5, 1.5$  Hz, 1H), 5.77 – 5.73 (m, 1H), 4.08 – 4.05 (m, 1H), 3.79 – 3.74 (m, 1H), 2.51 – 2.43 (m, 1H), 2.16 – 2.08 (m, 2H), 1.78 – 1.73 (m, 2H), 1.70 – 1.66 (m, 1H).  $^{13}\text{C}$  NMR (100 MHz,  $\text{CDCl}_3$ )  $\delta$  163.06 (d,  $J = 244.5$  Hz), 146.96, 132.28 (d,  $J = 8.4$  Hz), 131.65, 130.35 (d,  $J = 8.4$  Hz), 121.67 (d,  $J = 2.9$  Hz), 115.37 (d,  $J = 21.1$  Hz), 112.99 (d,  $J = 22.8$  Hz), 89.16, 67.41, 29.33, 24.72, 21.71. HRMS (ESI) calcd for  $\text{C}_{13}\text{H}_{15}\text{FN}_3\text{O}^+$   $[\text{M}+\text{H}]^+$  248.1194; found, 248.1193.

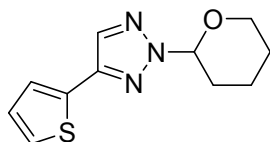

2-(tetrahydro-2H-pyran-2-yl)-4-(thiophen-2-yl)-2H-1,2,3-triazole (**3k**)

Yellow oil liquid; yield, 63%; IR (neat) 3470, 2951, 1648, 1392, 1075  $\text{cm}^{-1}$ ;  $^1\text{H}$  NMR (400 MHz,  $\text{CDCl}_3$ )  $\delta$  7.81 (s, 1H), 7.42 – 7.38 (m, 1H), 7.32 (d,  $J = 4.7$  Hz, 1H), 7.08 (t,  $J = 3.7$  Hz, 1H), 5.72 (d,  $J = 9.3$  Hz, 1H), 4.08 – 4.05 (m, 1H), 3.78 – 3.73 (m, 1H), 2.49–2.42 (m, 1H), 2.14 – 2.08 (m, 2H), 1.76 – 1.71 (m, 2H), 1.68 – 1.64 (m, 1H).  $^{13}\text{C}$  NMR (100 MHz,  $\text{CDCl}_3$ )  $\delta$  132.39, 131.33, 127.57, 125.74, 125.06, 109.99, 89.08, 76.68, 67.48, 29.37, 24.74, 21.80. HRMS (ESI) calcd for  $\text{C}_{11}\text{H}_{14}\text{N}_3\text{OS}^+$   $[\text{M}+\text{H}]^+$  236.0852; found, 236.0851.

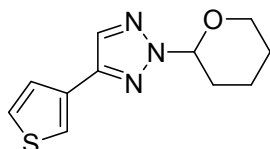

2-(tetrahydro-2H-pyran-2-yl)-4-(thiophen-3-yl)-2H-1,2,3-triazole (**3l**)

Yellow oil liquid; yield, 70%; IR (neat) 3466, 2953, 1648, 1368, 1067  $\text{cm}^{-1}$ ;  $^1\text{H}$  NMR (400 MHz,  $\text{CDCl}_3$ )  $\delta$  7.81 (s, 1H), 7.66 – 7.65 (m, 1H), 7.48 (d,  $J = 5.0$  Hz, 1H), 7.40 – 7.36 (m, 1H), 5.74 – 5.71 (m, 1H), 4.08 – 4.05 (m, 1H), 3.78 – 3.73 (m, 1H), 2.51 – 2.43 (m, 1H), 2.15 – 2.11 (m, 2H), 1.76 – 1.71 (m, 2H), 1.67 – 1.64 (m, 1H).  $^{13}\text{C}$  NMR (100 MHz,  $\text{CDCl}_3$ )  $\delta$  144.28, 131.68, 131.41, 126.29, 125.96, 121.95, 89.02, 67.45, 29.36, 24.72, 21.80. HRMS (ESI) calcd for  $\text{C}_{11}\text{H}_{14}\text{N}_3\text{OS}^+$   $[\text{M}+\text{H}]^+$  236.0852; found, 236.0852.

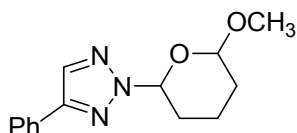

2-(6-methoxytetrahydro-2H-pyran-2-yl)-4-phenyl-2H-1,2,3-triazole (**4b**)

Colorless oil liquid; yield, 81%; IR (neat) 3466, 2960, 1648, 1374, 1009  $\text{cm}^{-1}$ ;  $^1\text{H}$  NMR (400 MHz,  $\text{CDCl}_3$ )  $\delta$  7.92 (s, 1H), 7.82 (d,  $J = 7.5$  Hz, 2H), 7.43 (t,  $J = 7.3$  Hz, 2H), 7.38 – 7.33 (m, 1H), 6.08 (d,  $J = 10.7$  Hz, 1H), 4.94 (s, 1H), 3.52 (s, 3H), 2.56 – 2.46 (m, 1H), 2.09 – 2.02 (m, 2H), 1.90 – 1.85 (m, 2H), 1.79 – 1.76 (m, 1H).  $^{13}\text{C}$  NMR (100 MHz,  $\text{CDCl}_3$ )  $\delta$  148.28, 131.74, 130.13, 128.78, 128.58, 126.12, 100.34, 83.75, 55.28, 29.44, 28.74, 17.65. HRMS (ESI) calcd for  $\text{C}_{14}\text{H}_{18}\text{N}_3\text{O}_2^+$   $[\text{M}+\text{H}]^+$  260.1394; found, 260.1393.

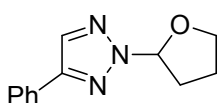

4-phenyl-2-(tetrahydrofuran-2-yl)-2H-1,2,3-triazole (**4c**)

Colorless oil liquid; yield, 94%; IR (neat) 3474, 2979, 1645, 1381, 1074  $\text{cm}^{-1}$ ;  $^1\text{H}$  NMR (400 MHz,  $\text{CDCl}_3$ )  $\delta$  7.87 (s, 1H), 7.80 (d,  $J = 7.9$  Hz, 2H), 7.42 (t,  $J = 7.6$  Hz, 2H), 7.35 (t,  $J = 7.4$  Hz, 1H), 6.34 (d,  $J = 4.8$  Hz, 1H), 4.22 – 4.17 (m, 1H), 4.08 – 4.03 (m, 1H), 2.72 – 2.66 (m, 1H), 2.48 – 2.39 (m, 2H), 2.13 – 2.07 (m, 1H).  $^{13}\text{C}$  NMR (100 MHz,  $\text{CDCl}_3$ )  $\delta$  147.99, 131.36, 130.25, 128.77, 128.45, 125.96, 92.26, 69.53, 31.30, 24.44. HRMS (ESI) calcd for  $\text{C}_{12}\text{H}_{14}\text{N}_3\text{O}^+$   $[\text{M}+\text{H}]^+$  216.1131; found 216.1130.

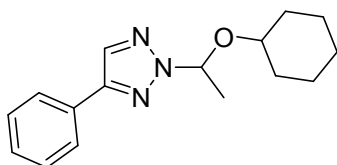

2-(1-(cyclohexyloxy)ethyl)-4-phenyl-2H-1,2,3-triazole (**4d**)

Colorless oil liquid; yield, 51%; IR (neat) 3465, 2948, 1644, 1383, 1102  $\text{cm}^{-1}$ ;  $^1\text{H}$  NMR (400 MHz,  $\text{CDCl}_3$ )  $\delta$  7.89 (s, 1H), 7.83 (d,  $J = 7.5$  Hz, 2H), 7.43 (t,  $J = 7.4$  Hz, 2H), 7.34 (t,  $J = 7.2$  Hz, 1H), 5.97 – 5.93 (m, 1H), 3.41 – 3.37 (m, 1H), 2.02 – 1.99 (m, 1H), 1.81 (d,  $J = 5.9$  Hz, 3H), 1.74 – 1.72 (m, 2H), 1.64 – 1.58 (m, 1H), 1.47 – 1.40 (m, 2H), 1.26 – 1.78 (m, 4H).  $^{13}\text{C}$  NMR (100 MHz,  $\text{CDCl}_3$ )  $\delta$  147.67, 131.09, 130.38, 128.80, 128.44, 125.99, 87.19, 76.17, 32.64, 31.36, 25.48, 23.99, 23.91, 21.42. HRMS (ESI) calcd for  $\text{C}_{16}\text{H}_{22}\text{N}_3\text{O}^+$   $[\text{M}+\text{H}]^+$  272.1757; found, 272.1758.

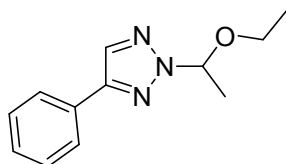

2-(1-ethoxyethyl)-4-phenyl-2H-1,2,3-triazole (**4e**)

Colorless oil liquid; yield, 64%; IR (neat) 3466, 3001, 1650, 1357, 1125  $\text{cm}^{-1}$ ;  $^1\text{H}$  NMR (400 MHz,  $\text{CDCl}_3$ )  $\delta$  7.91 (s, 1H), 7.83 (d,  $J = 7.4$  Hz, 2H), 7.44 (t,  $J = 7.7$  Hz, 2H), 7.36 (t,  $J = 7.3$  Hz, 1H), 5.81 (q,  $J = 6.0$  Hz, 1H), 3.60 – 3.53 (m, 1H), 3.43 – 3.36 (m, 1H), 1.84 (d,  $J = 6.0$  Hz, 3H), 1.16 (t,  $J = 7.0$  Hz, 3H).  $^{13}\text{C}$  NMR (100 MHz,  $\text{CDCl}_3$ )  $\delta$  147.82, 131.26, 130.26, 128.82, 128.51, 125.99, 89.44, 64.57, 20.88, 14.72. HRMS (ESI) calcd for  $\text{C}_{12}\text{H}_{16}\text{N}_3\text{O}^+$   $[\text{M}+\text{H}]^+$  218.1288; found 218.1285.

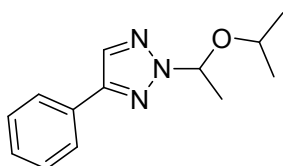

2-(1-isopropoxyethyl)-4-phenyl-2H-1,2,3-triazole (**4f**)

Colorless oil liquid; yield, 56%; IR (neat) 3473, 2972, 1649, 1375, 1118  $\text{cm}^{-1}$ ;  $^1\text{H}$  NMR (400 MHz,  $\text{CDCl}_3$ )  $\delta$  7.90 (s, 1H), 7.83 (d,  $J = 7.8$  Hz, 2H), 7.43 (t,  $J = 7.4$  Hz, 2H), 7.35 (t,  $J = 7.2$  Hz, 1H), 5.91 (q,  $J = 5.8$  Hz, 1H), 3.73 - 3.67 (m, 1H), 1.81 (d,  $J = 5.9$  Hz, 3H), 1.24 (d,  $J = 6.0$  Hz, 3H), 0.95 (d,  $J = 6.1$  Hz, 3H).  $^{13}\text{C}$  NMR (100 MHz,  $\text{CDCl}_3$ )  $\delta$  147.70, 131.15, 130.31, 128.81, 128.47, 125.98, 87.41, 70.40, 22.62, 21.37. HRMS (ESI) calcd for  $\text{C}_{13}\text{H}_{18}\text{N}_3\text{O}^+$   $[\text{M}+\text{H}]^+$  232.1444; found, 232.1444.

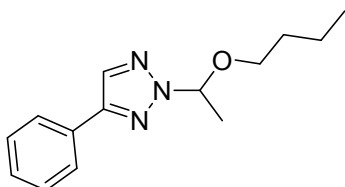

2-(1-butoxyethyl)-4-phenyl-2H-1,2,3-triazole (**4g**)

Colorless oil liquid; yield, 75%; IR (neat) 3475, 2956, 1634, 1381, 1129  $\text{cm}^{-1}$ ;  $^1\text{H}$  NMR (400 MHz,  $\text{CDCl}_3$ )  $\delta$  7.91 (s, 1H), 7.83 (d,  $J = 7.7$  Hz, 2H), 7.43 (t,  $J = 7.4$  Hz, 2H), 7.35 (t,  $J = 7.3$  Hz, 1H), 5.79 (q,  $J = 5.9$  Hz, 1H), 3.53 - 3.47 (m, 1H), 3.35 – 3.30 (m, 1H), 1.83 (d,  $J = 6.0$  Hz, 3H), 1.54 – 1.47 (m, 2H), 1.35 – 1.26 (m, 2H), 0.85 (t,  $J = 7.4$  Hz, 3H).  $^{13}\text{C}$  NMR (100 MHz,  $\text{CDCl}_3$ )  $\delta$  147.75, 131.21, 130.29, 128.79, 128.46, 125.97, 89.64, 68.82, 31.21, 20.80, 19.04, 13.68. HRMS (ESI) calcd for  $\text{C}_{14}\text{H}_{20}\text{N}_3\text{O}^+$   $[\text{M}+\text{H}]^+$  246.1601; found 246.1601.



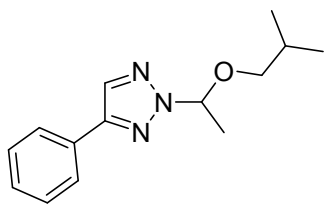

2-(1-isobutoxyethyl)-4-phenyl-2H-1,2,3-triazole (**4h**)

Colorless oil liquid; yield, 70%; IR (neat) 3468, 2959, 1648, 1381, 1126  $\text{cm}^{-1}$ ;  $^1\text{H}$  NMR (400 MHz,  $\text{CDCl}_3$ )  $\delta$  7.90 (s, 1H), 7.83 (d,  $J = 7.8$  Hz, 2H), 7.44 (t,  $J = 7.5$  Hz, 2H), 7.36 (t,  $J = 7.1$  Hz, 1H), 5.77 (q,  $J = 5.9$  Hz, 1H), 3.30 – 3.25 (m, 1H), 3.12 – 3.07 (m, 1H), 1.84 (d,  $J = 5.9$  Hz, 3H), 1.82 – 1.74 (m, 1H), 0.87 (d,  $J = 6.6$  Hz, 3H), 0.82 (d,  $J = 6.7$  Hz, 3H).  $^{13}\text{C}$  NMR (100 MHz,  $\text{CDCl}_3$ )  $\delta$  147.72, 131.20, 130.33, 128.81, 128.47, 125.98, 89.85, 75.78, 28.13, 20.74, 19.19, 19.06. HRMS (ESI) calcd for  $\text{C}_{14}\text{H}_{20}\text{N}_3\text{O}^+$   $[\text{M}+\text{H}]^+$  246.1601; found, 246.1601.

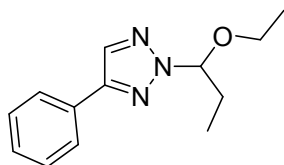

2-(1-ethoxypropyl)-4-phenyl-2H-1,2,3-triazole (**4i**)

Colorless oil liquid; yield, 79%; IR (neat) 3465, 2963, 1650, 1381, 1107  $\text{cm}^{-1}$ ;  $^1\text{H}$  NMR (400 MHz,  $\text{CDCl}_3$ )  $\delta$  7.91 (s, 1H), 7.82 (d,  $J = 7.4$  Hz, 2H), 7.42 (t,  $J = 7.4$  Hz, 2H), 7.34 (t,  $J = 7.2$  Hz, 1H), 5.52 (t,  $J = 6.6$  Hz, 1H), 3.47 – 3.59 (m, 1H), 3.43 – 3.35 (m, 1H), 2.25 – 2.17 (m, 2H), 1.15 (t,  $J = 7.0$  Hz, 3H), 0.88 (t,  $J = 7.4$  Hz, 3H).  $^{13}\text{C}$  NMR (100 MHz,  $\text{CDCl}_3$ )  $\delta$  147.82, 131.28, 130.26, 128.79, 128.47, 125.96, 94.45, 64.71, 28.00, 14.67, 9.05. HRMS (ESI) calcd for  $\text{C}_{14}\text{H}_{18}\text{N}_3\text{O}_2^+$   $[\text{M}+\text{H}]^+$  232.1450; found, 232.1443.

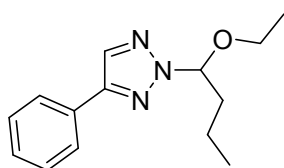

2-(1-ethoxybutyl)-4-phenyl-2H-1,2,3-triazole (**4j**)

Colorless oil liquid; yield, 90%; IR (neat) 3469, 2962, 1647, 1381, 1112  $\text{cm}^{-1}$ ;  $^1\text{H}$  NMR (400 MHz,  $\text{CDCl}_3$ )  $\delta$  7.91 (s, 1H), 7.83 (d,  $J = 7.6$  Hz, 2H), 7.43 (t,  $J = 7.3$  Hz, 2H), 7.35 (t,  $J = 7.3$  Hz, 1H), 5.62 (t,  $J = 6.6$  Hz, 1H), 3.58 – 3.50 (m, 1H), 3.45 – 3.37 (m, 1H), 2.22 – 2.16 (m, 2H), 1.47 – 1.37 (m, 1H), 1.27 – 1.21 (m, 1H), 1.16 (t,  $J = 7.0$  Hz, 3H), 0.94 (t,  $J = 7.4$  Hz, 3H).  $^{13}\text{C}$  NMR (100 MHz,  $\text{CDCl}_3$ )  $\delta$  147.78, 131.22, 130.26, 128.77, 128.45, 125.96, 92.96, 64.65, 36.62, 17.94, 14.66, 13.50. HRMS (ESI) calcd for  $\text{C}_{14}\text{H}_{20}\text{N}_3\text{O}^+$   $[\text{M}+\text{H}]^+$  246.1601; found, 246.1600.

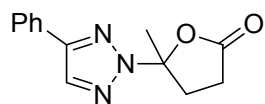

5-methyl-5-(4-phenyl-2H-1,2,3-triazol-2-yl)dihydrofuran-2(3H)-one (**4k**)<sup>2</sup>

<sup>1</sup>H NMR (400 MHz, CDCl<sub>3</sub>) δ 7.91 (s, 1H), 7.79 (d, *J* = 7.2 Hz, 2H), 7.44 (t, *J* = 7.4 Hz, 2H), 7.39 (d, *J* = 7.0 Hz, 1H), 3.33 – 3.15 (m, 2H), 2.80 – 2.71 (m, 1H), 2.54 (dt, *J* = 13.2, 9.9 Hz, 1H), 2.25 (s, 3H);  
<sup>13</sup>C NMR (100 MHz, CDCl<sub>3</sub>) δ 175.39, 148.70, 132.09, 129.68, 128.91, 128.87, 126.12, 109.97, 97.30, 34.28, 29.21, 25.39.

### 3. Deuterium-Labeling Experiment Result

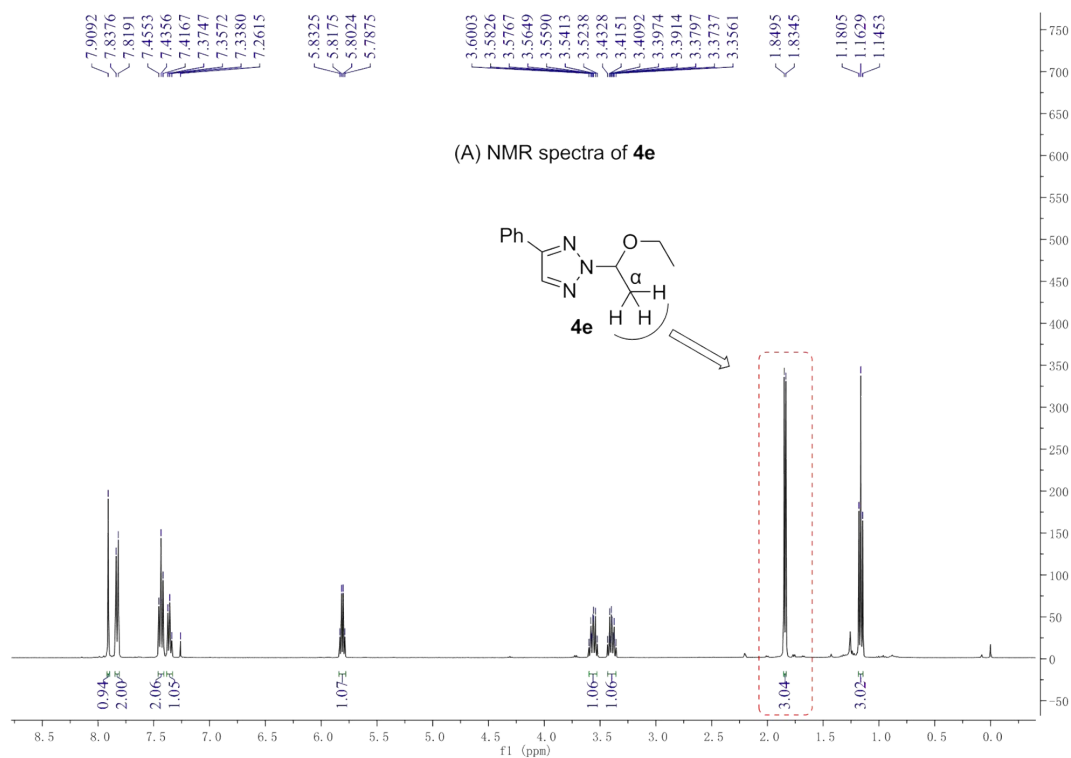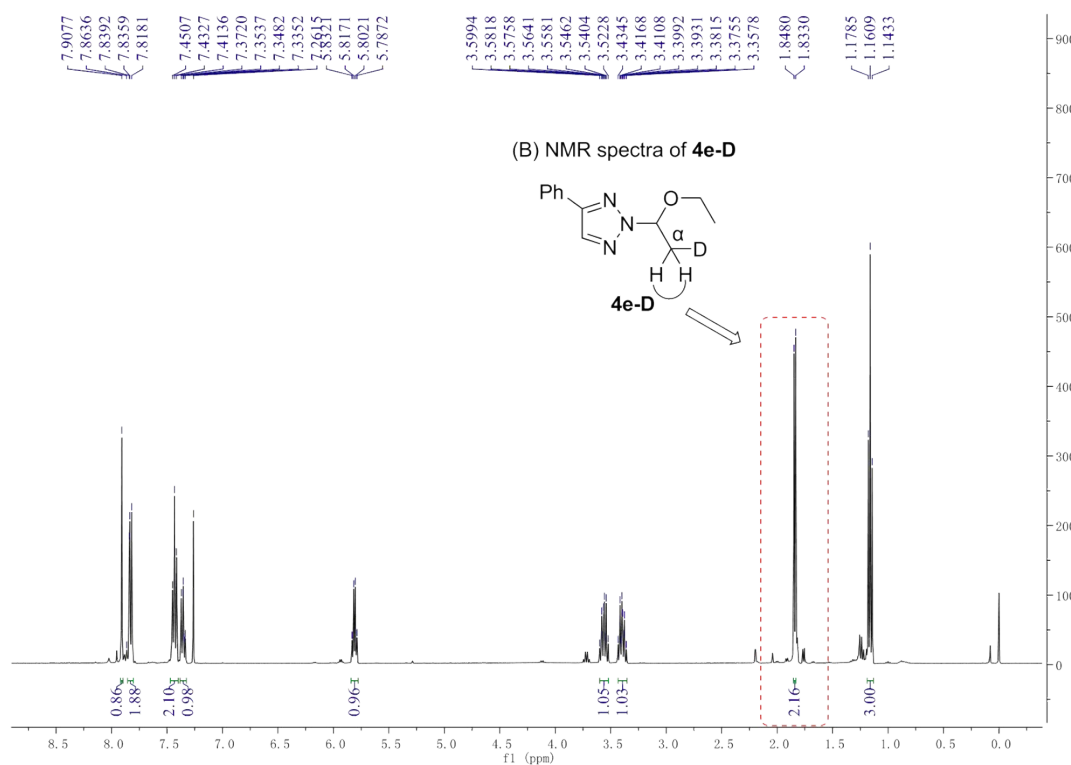

The incorporation of deuterium at the  $\alpha$ -position ( $f1 = 1.84$  ppm) of **4e** is  $(3.04-2.16)/3.04 \times 100\% = 28\%$ .

## 4. References

1. Yoo, E. J.; Ahlquist, M.; Kim, S. H.; Bae, I.; Fokin, V. V.; Sharpless, K. B.; Chang, S., *Angew. Chem. Int. Ed.*, **2007**, *46* (10), 1730-1733.
2. J. W. Shi, L. L. Zhu, J. Wen and Z. L. Chen, *Chinese. J. Catal.*, 2016, **37**, 1222-1226.

## 5. NMR Spectra of 3a-3I

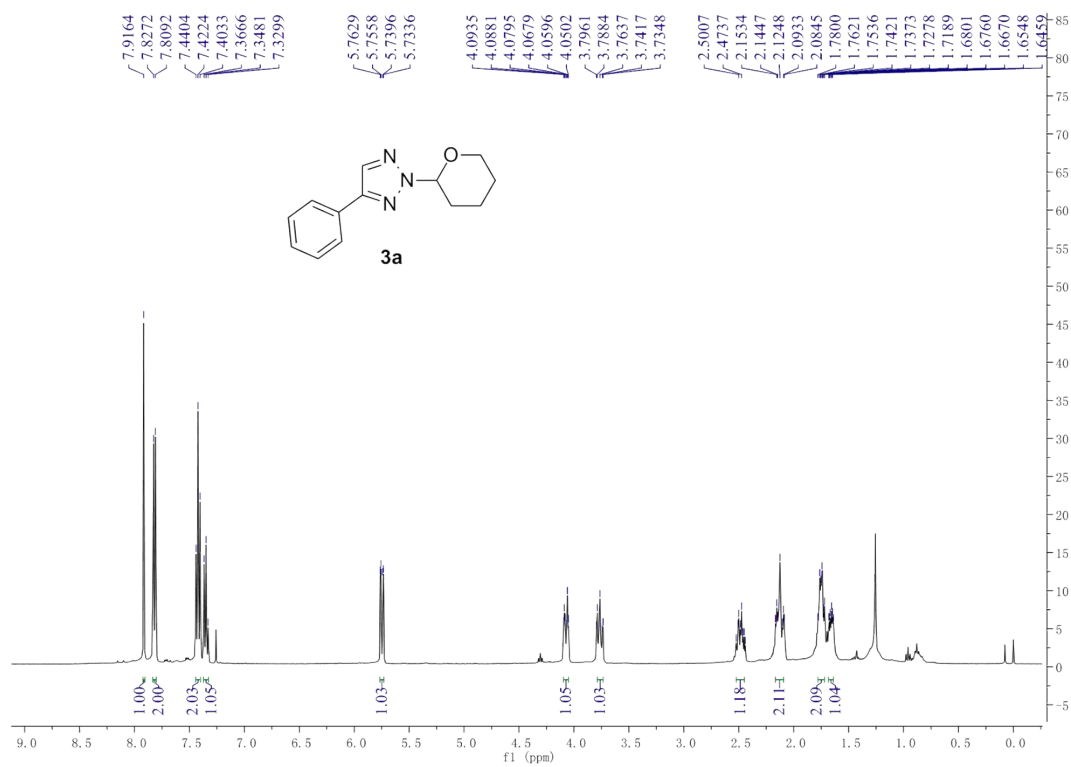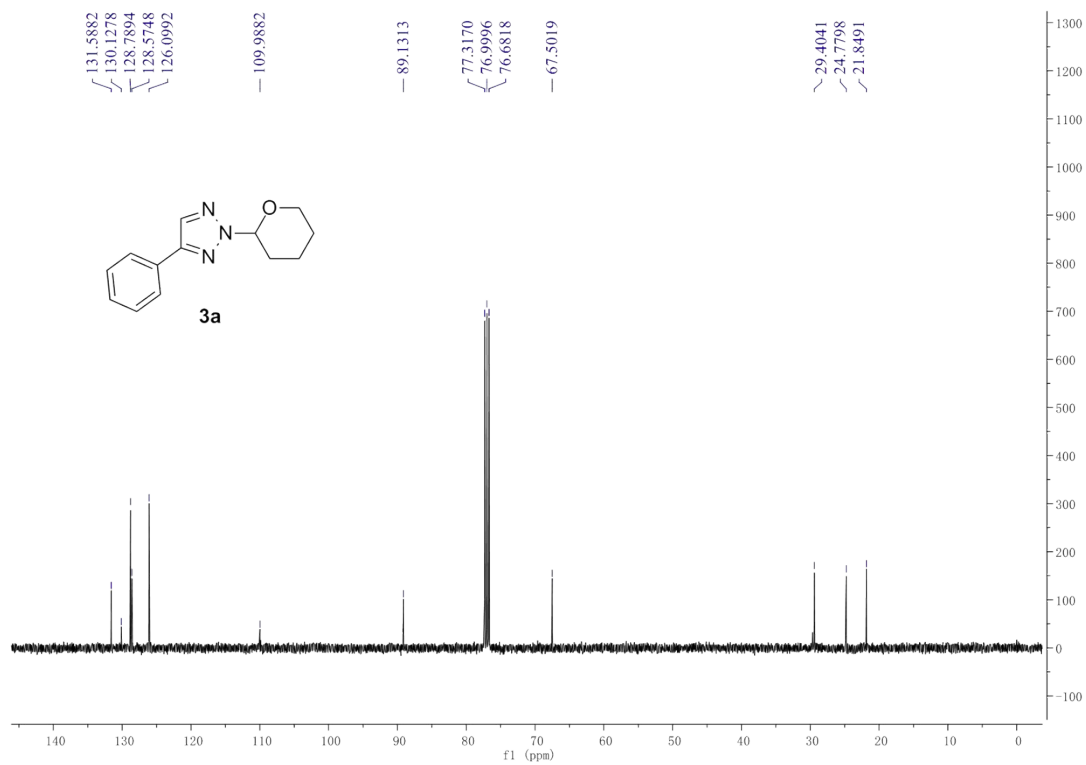

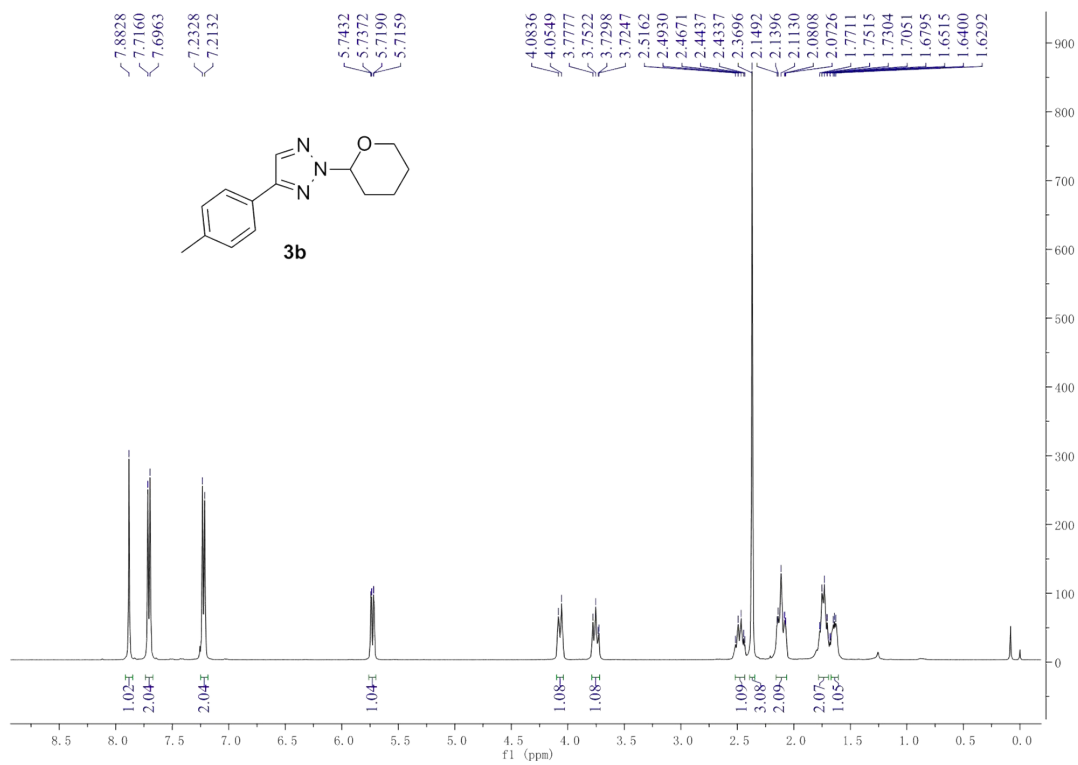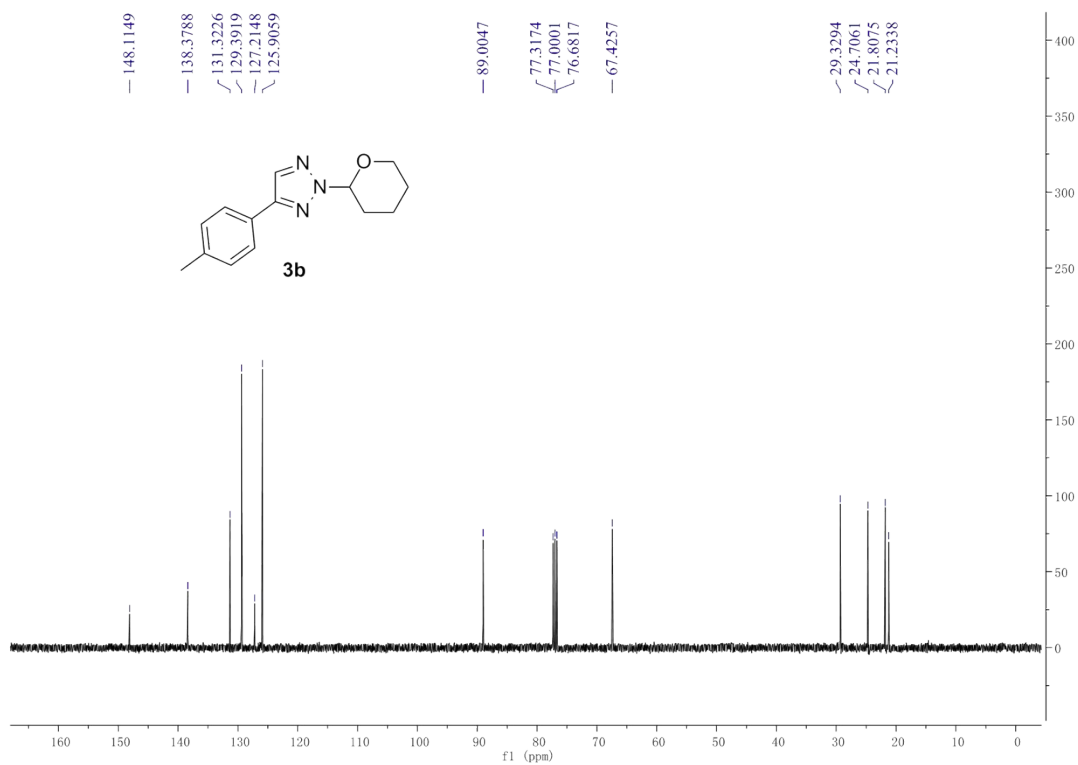

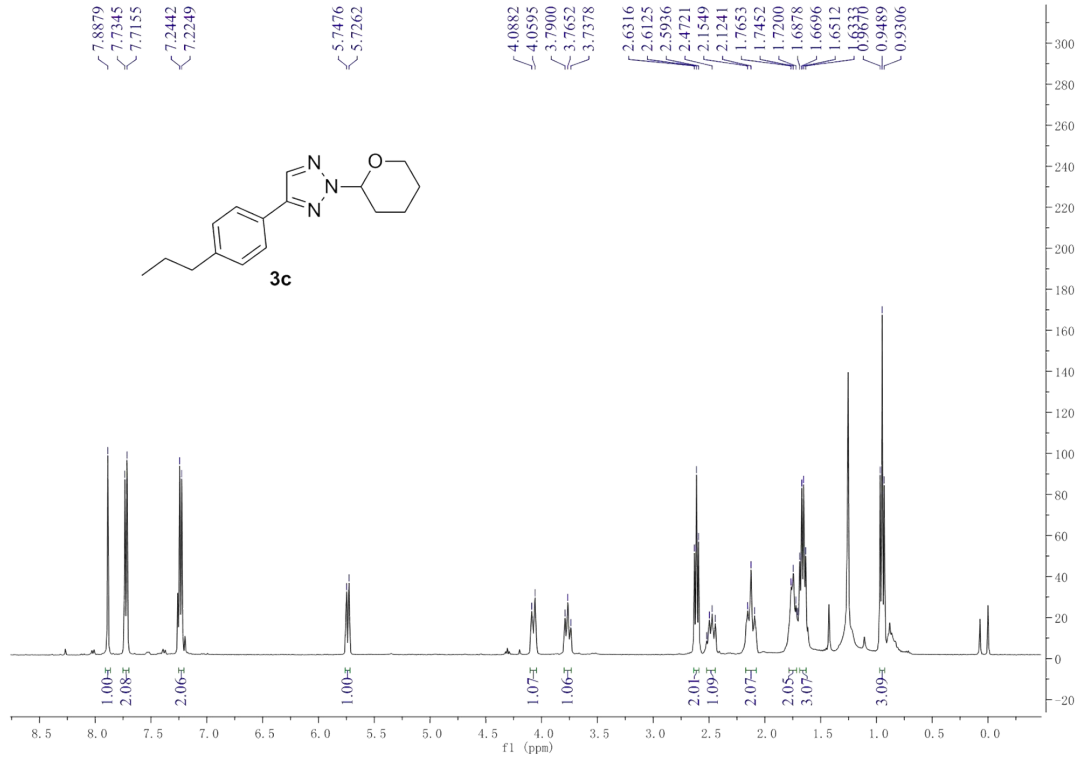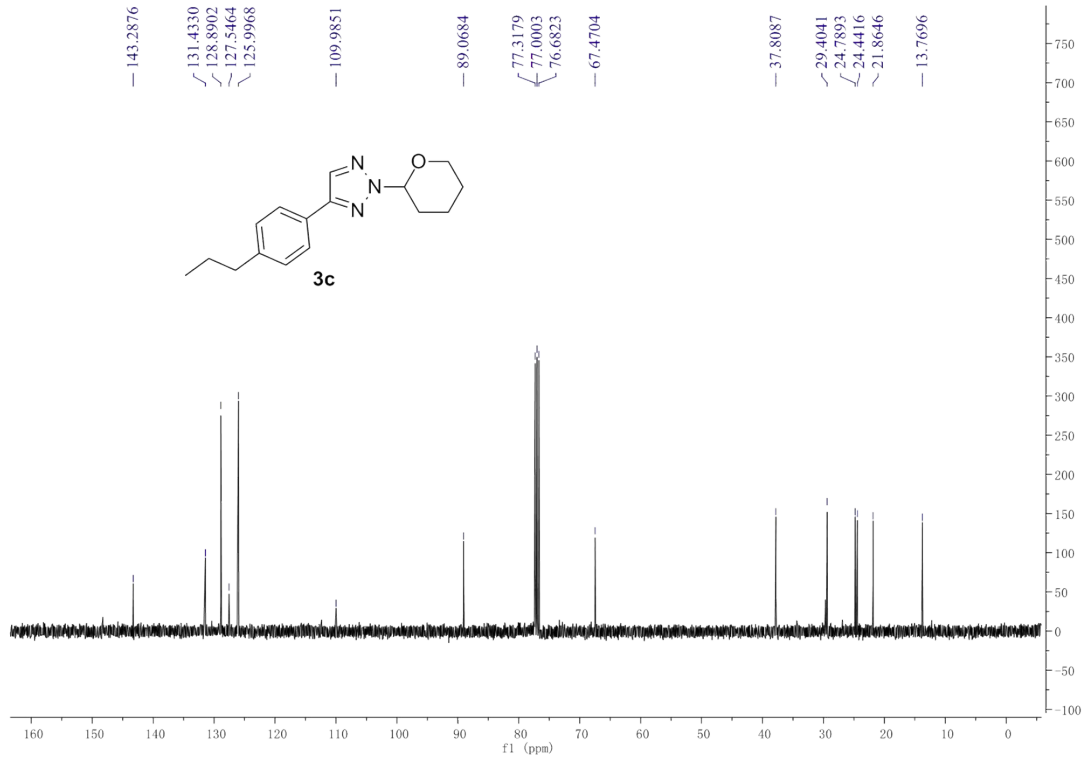

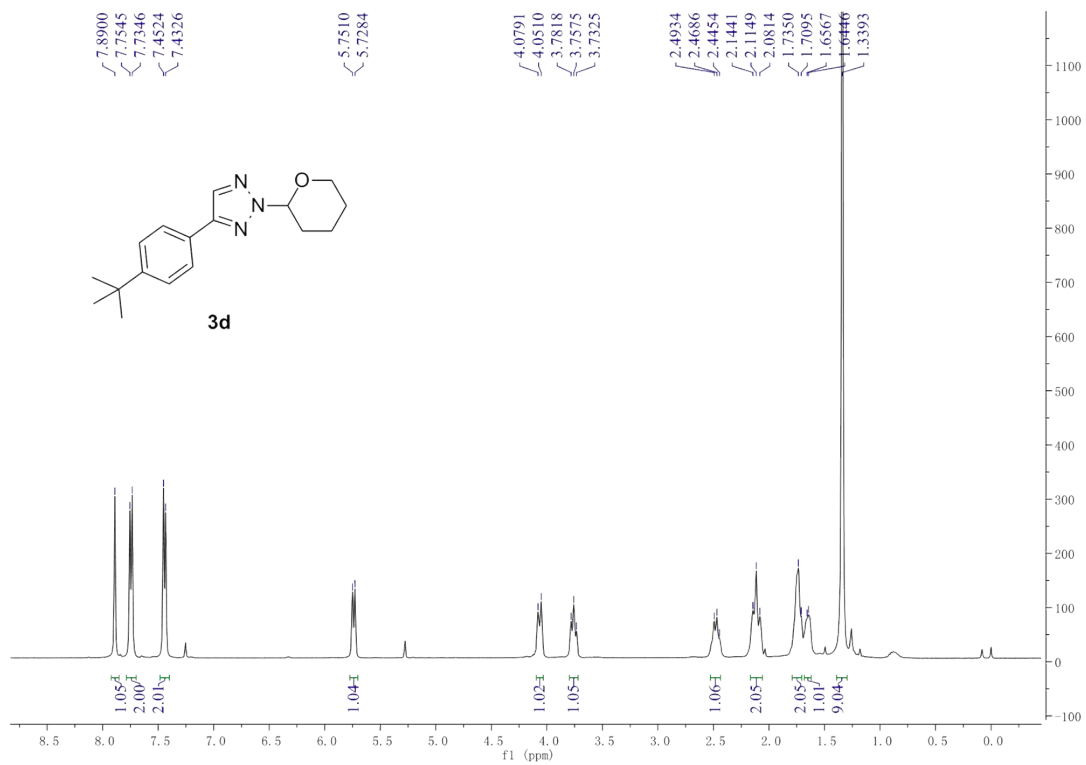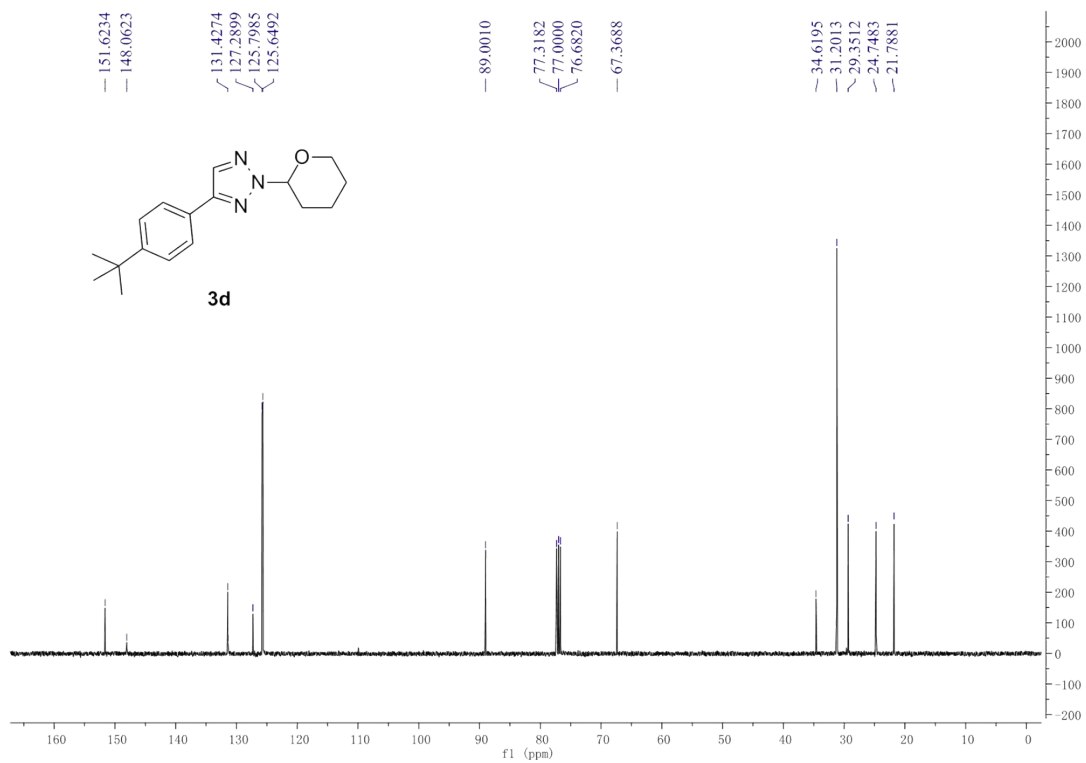



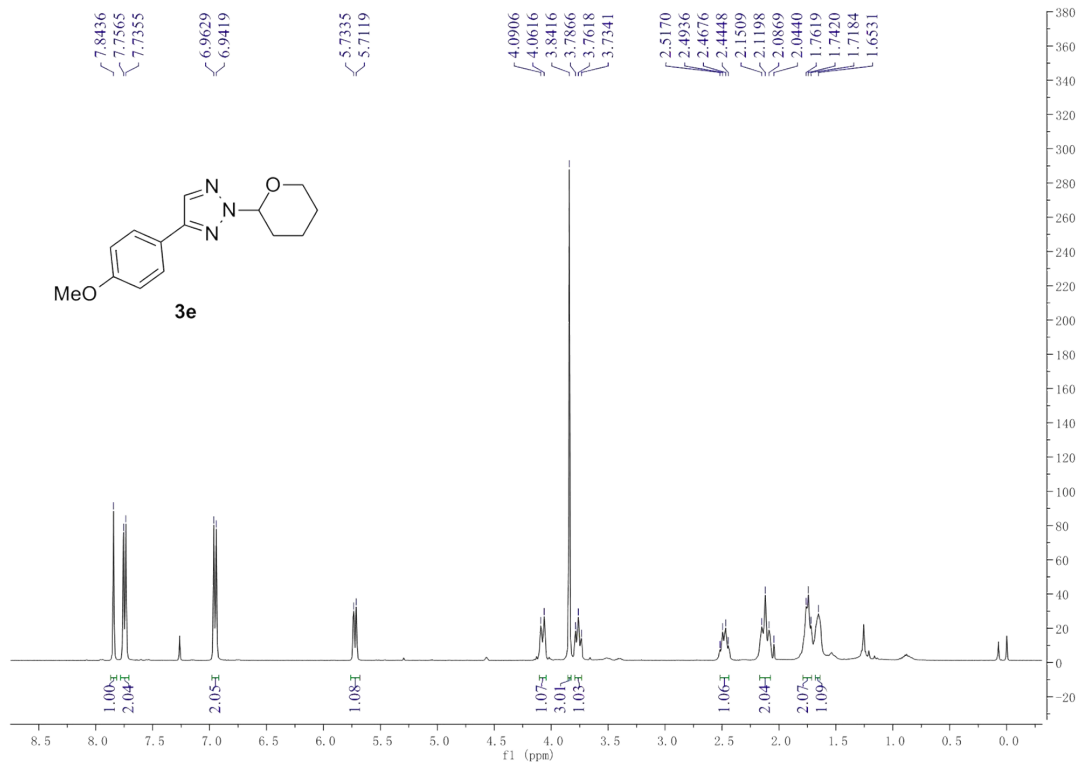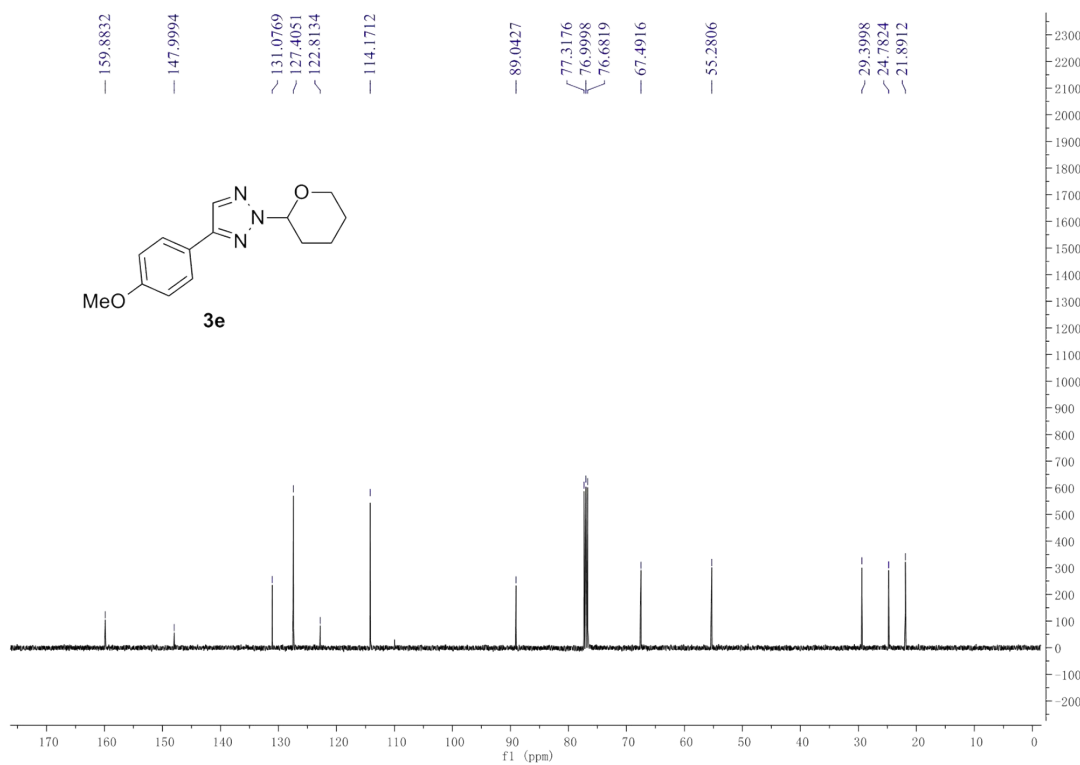

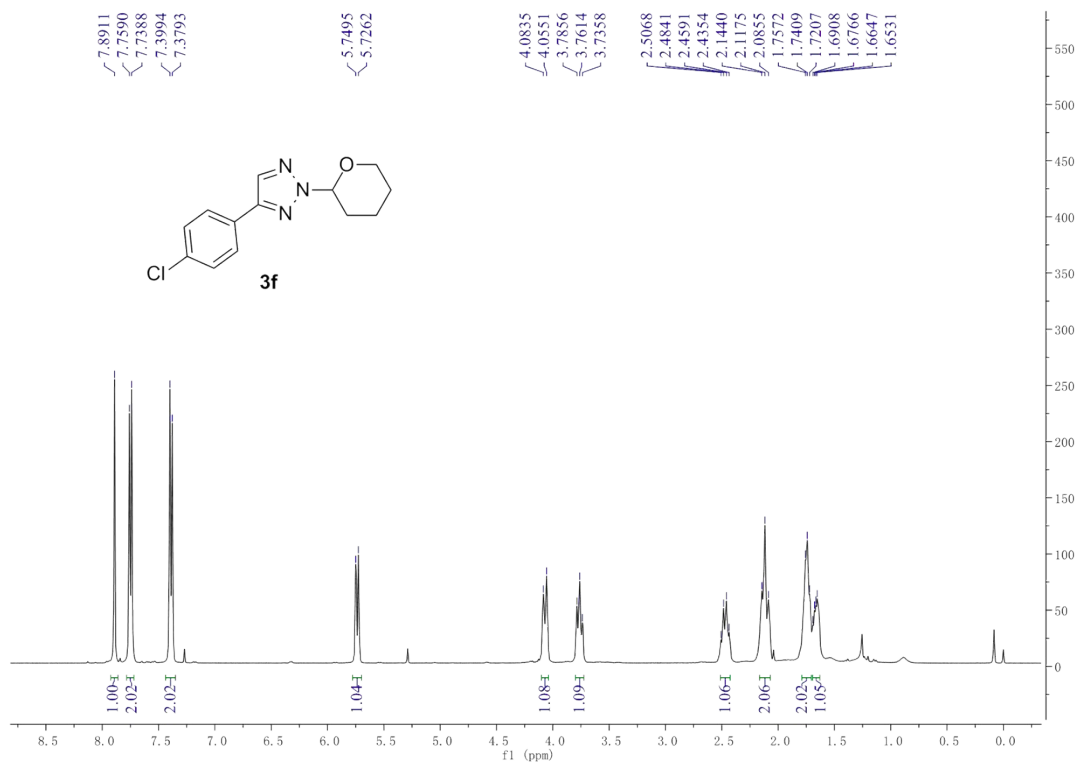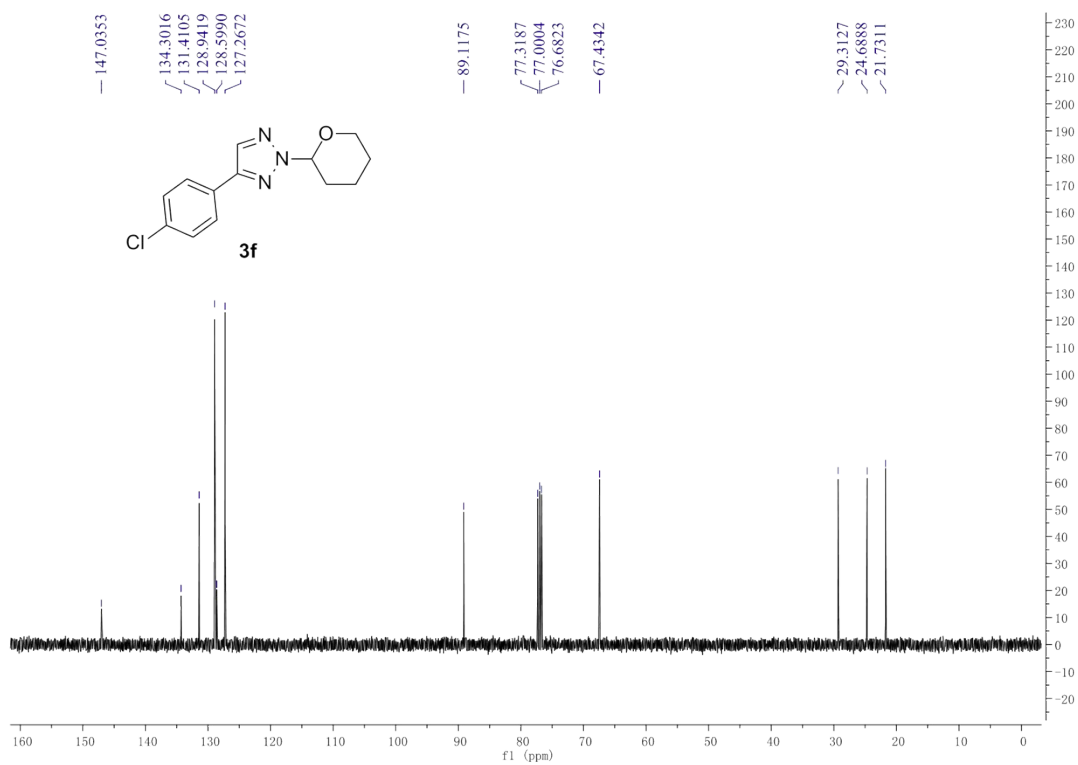

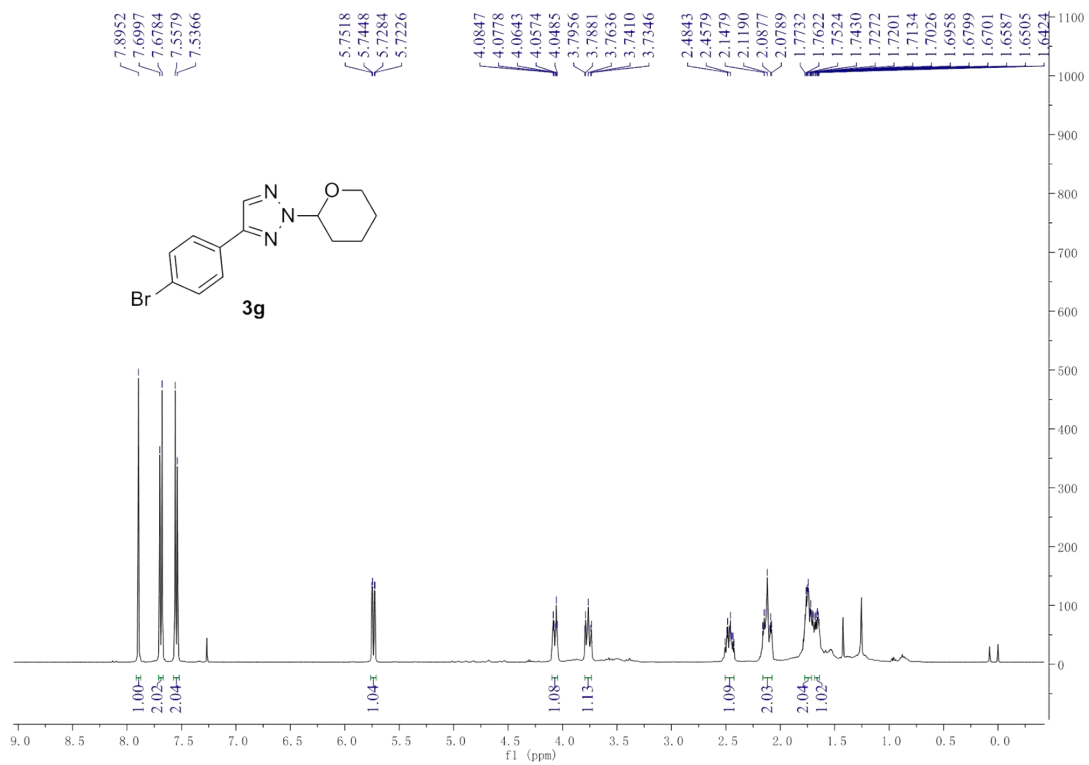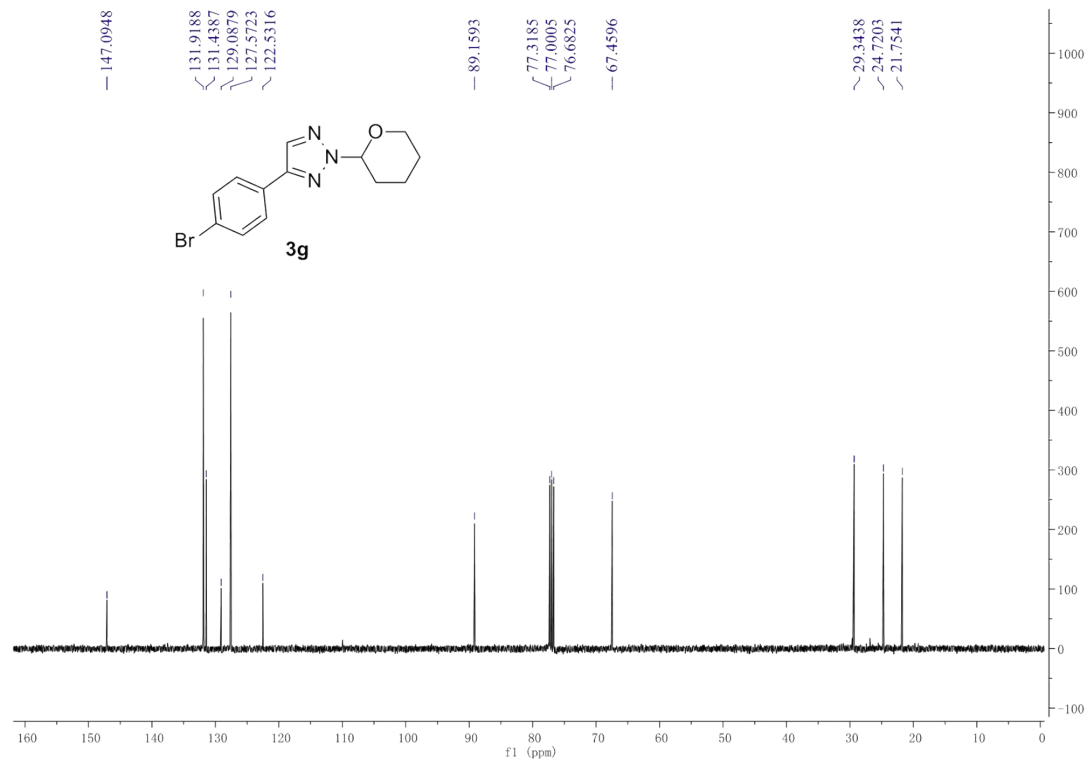

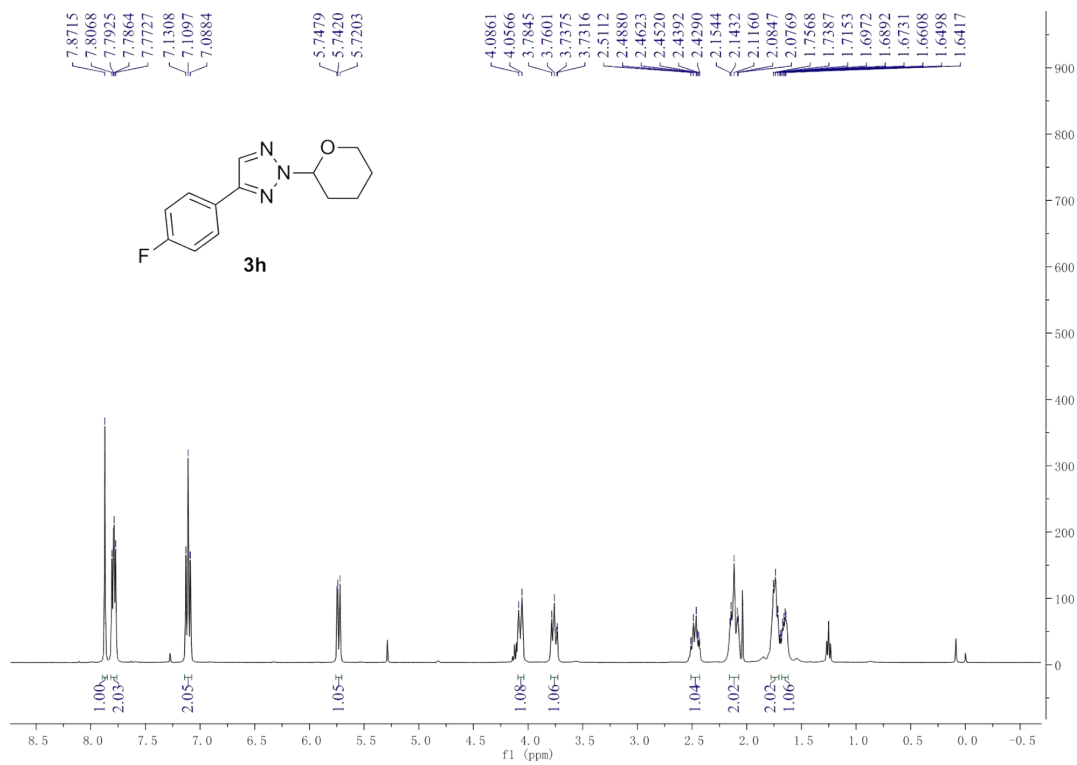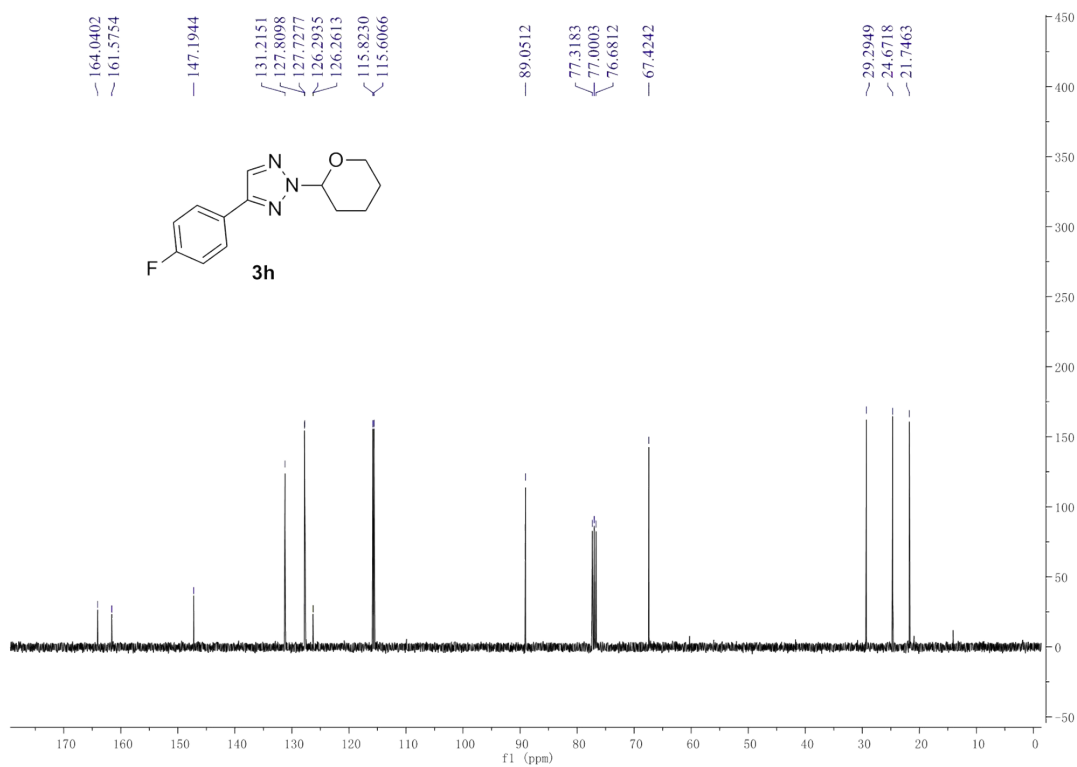

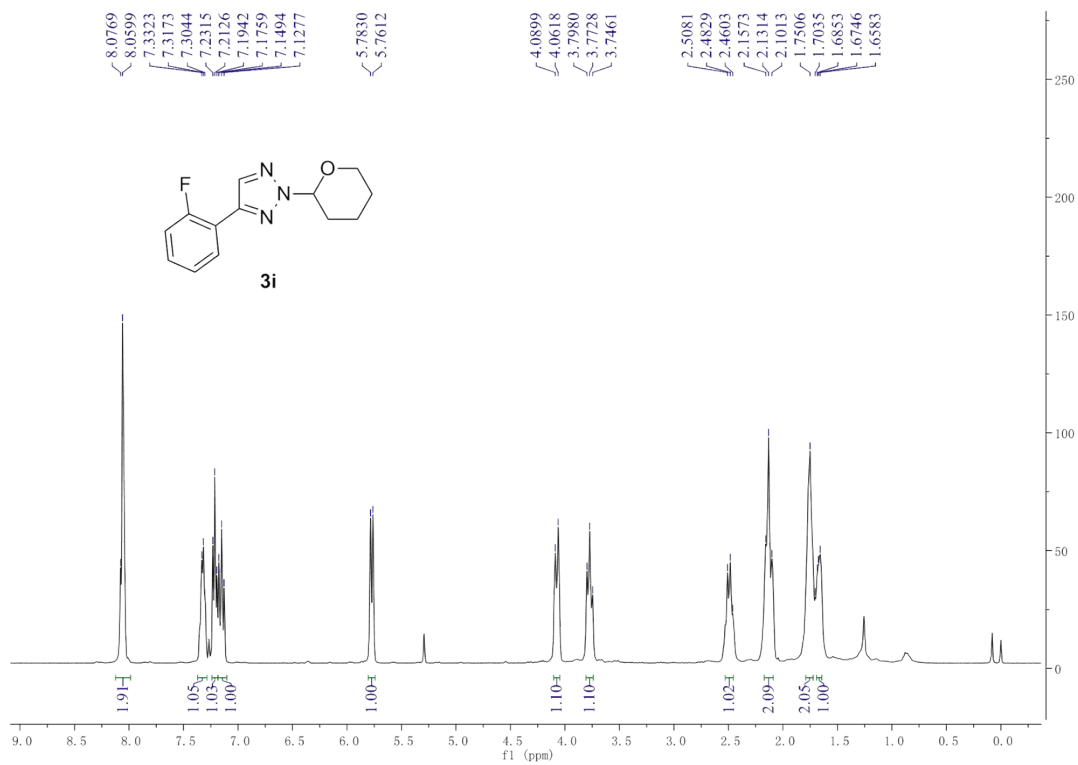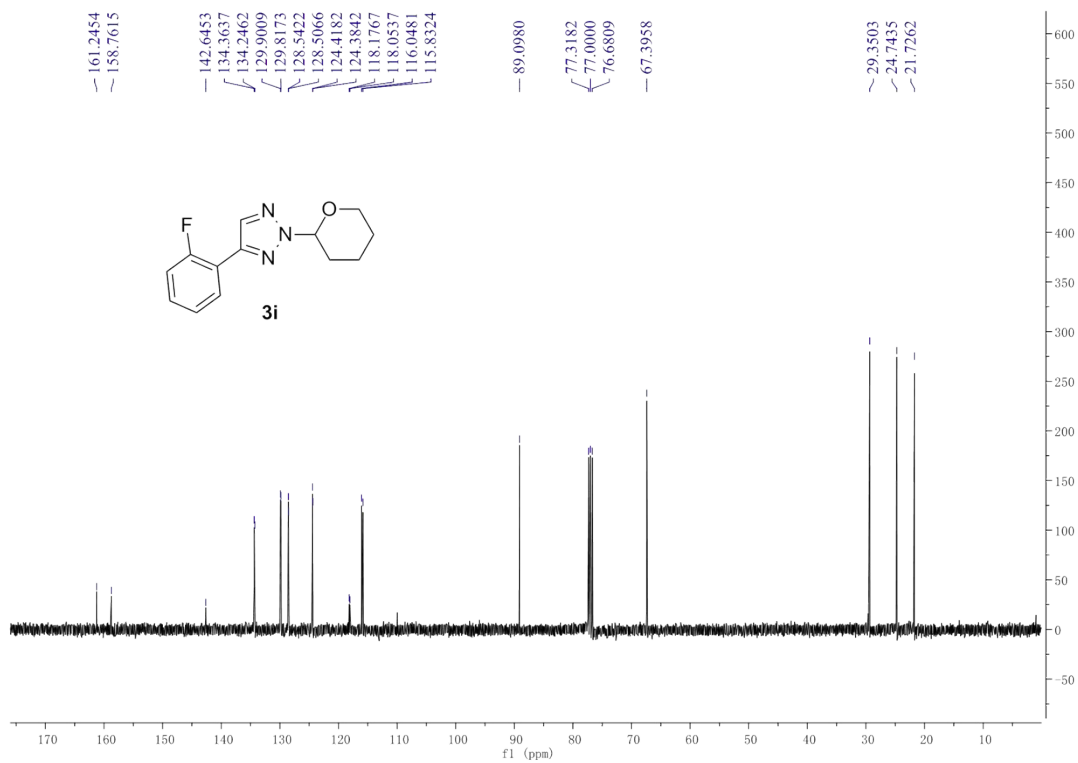

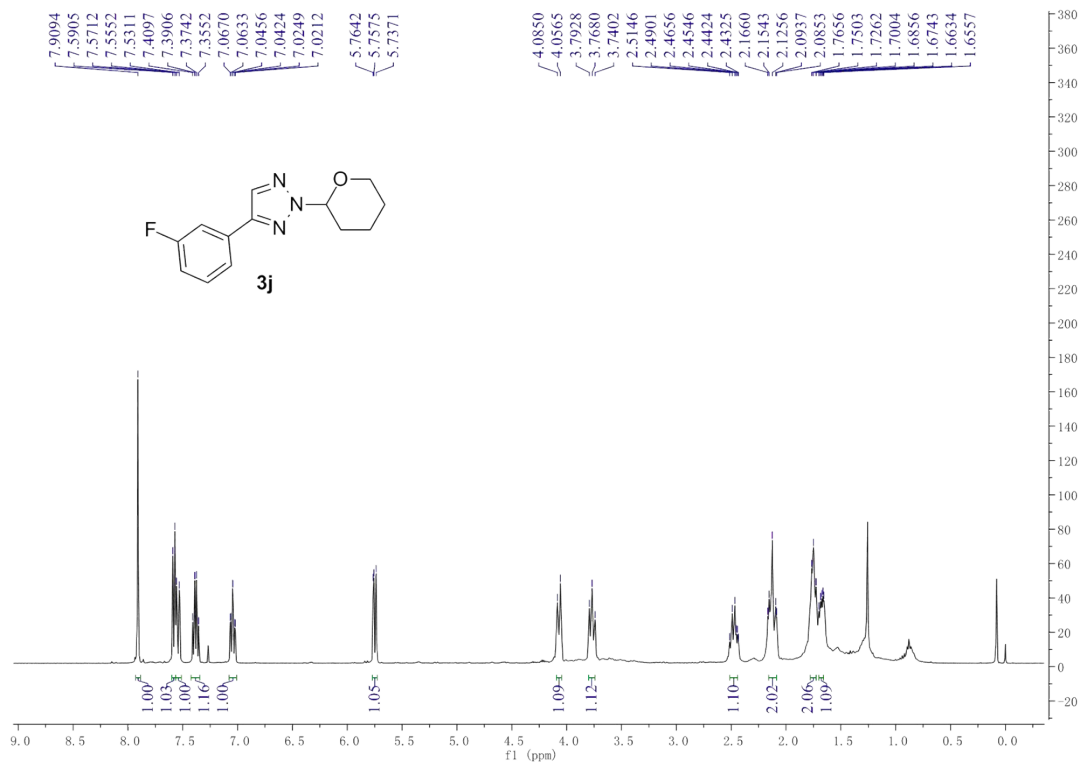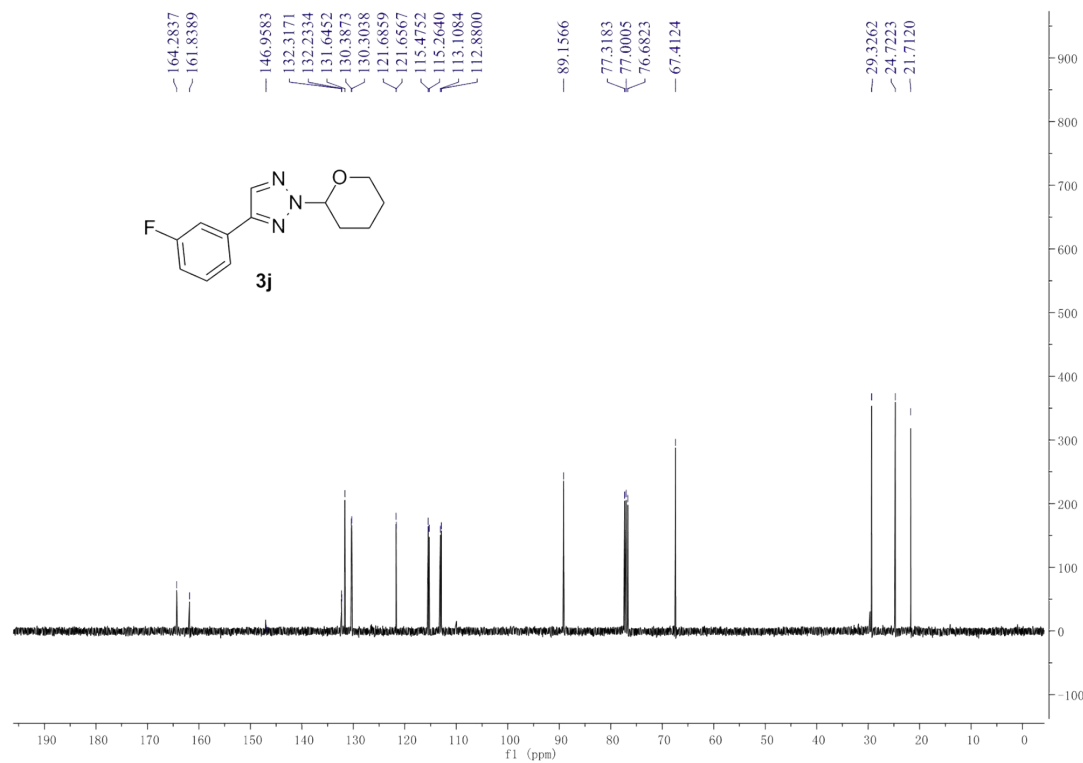

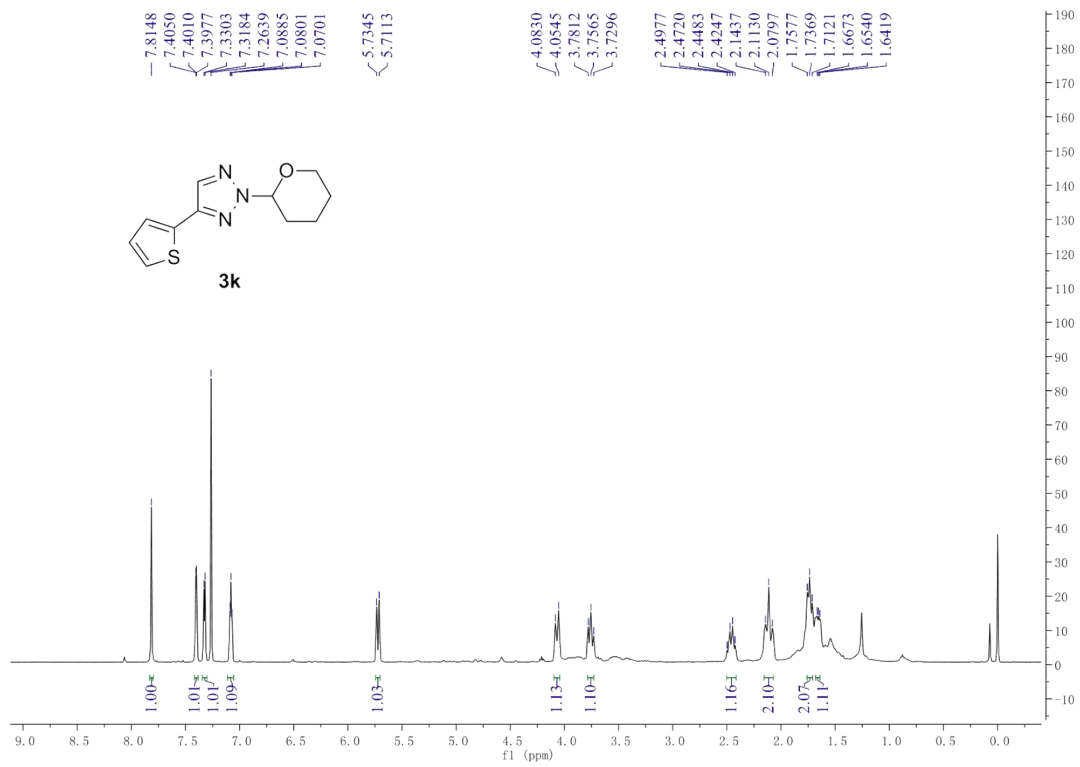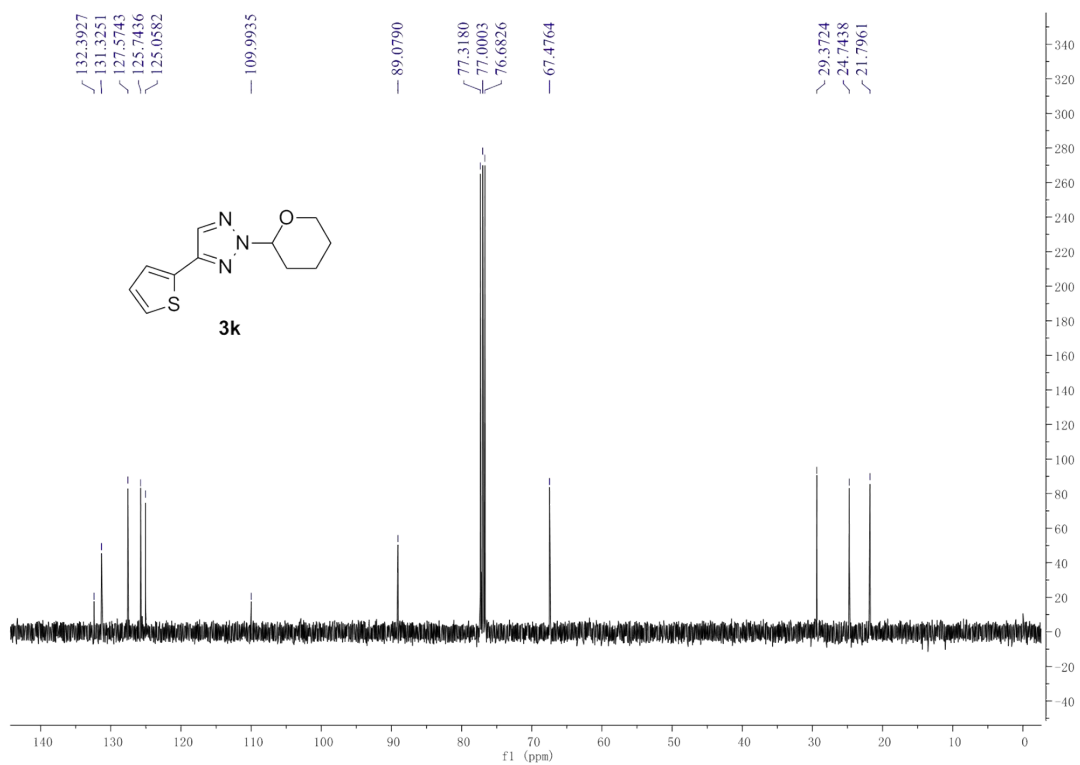

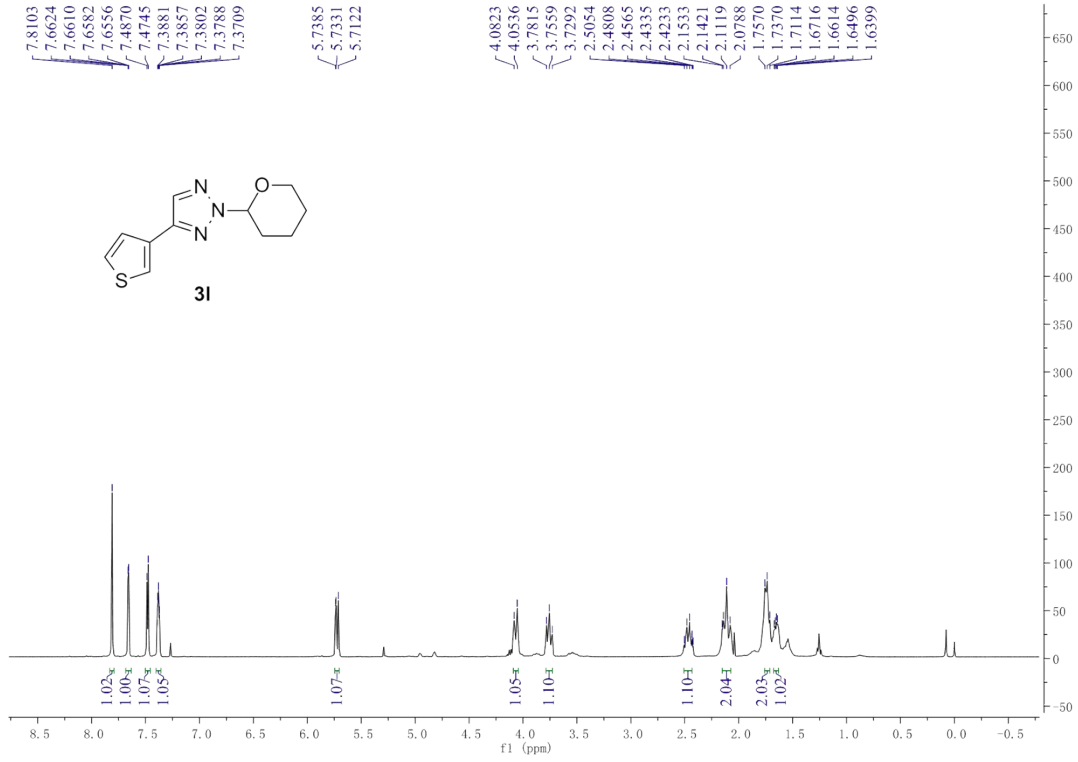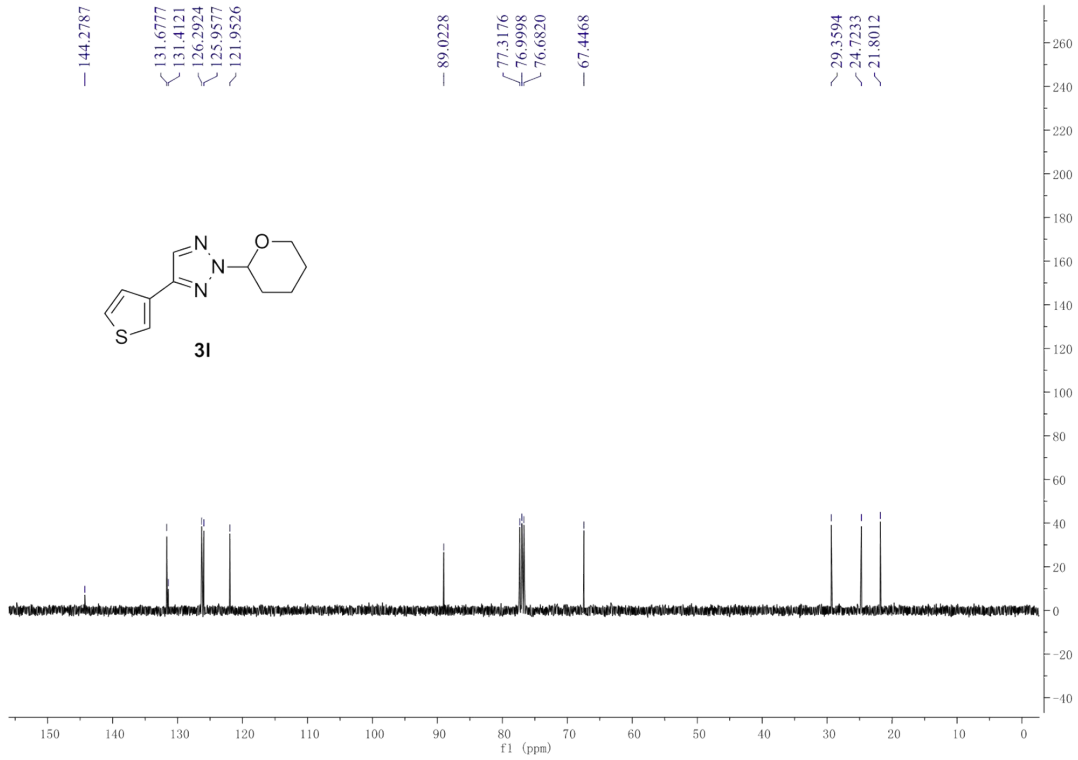



## 6. NMR Spectra of 4b-4k

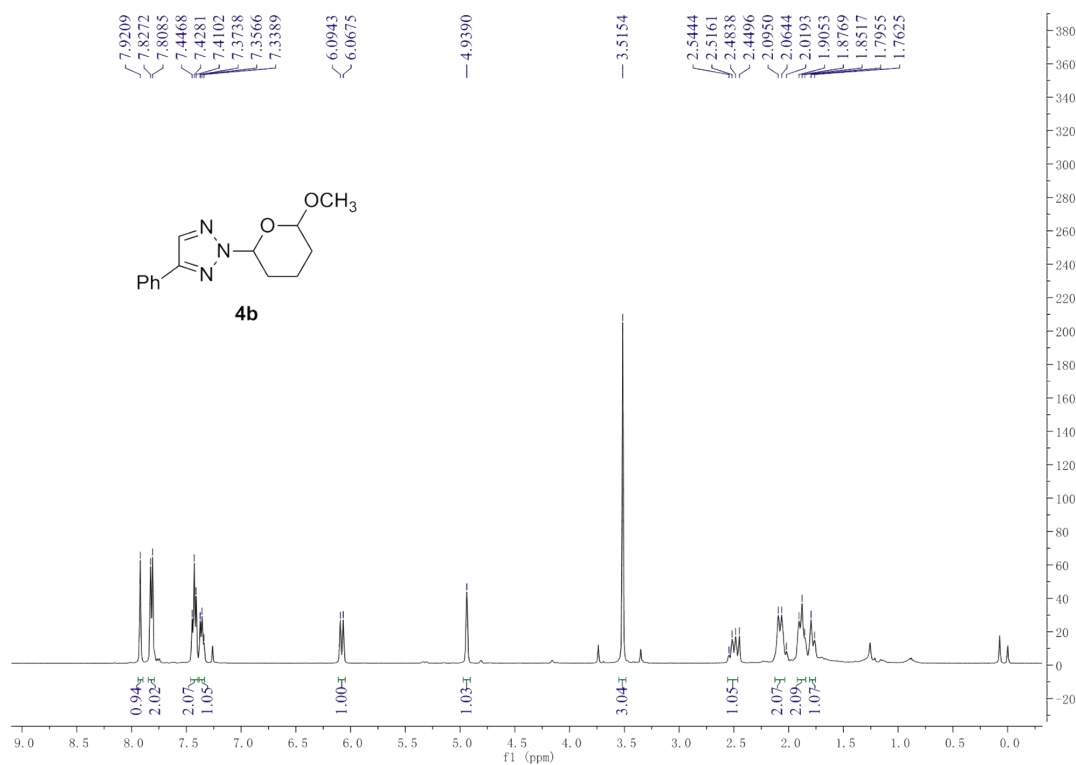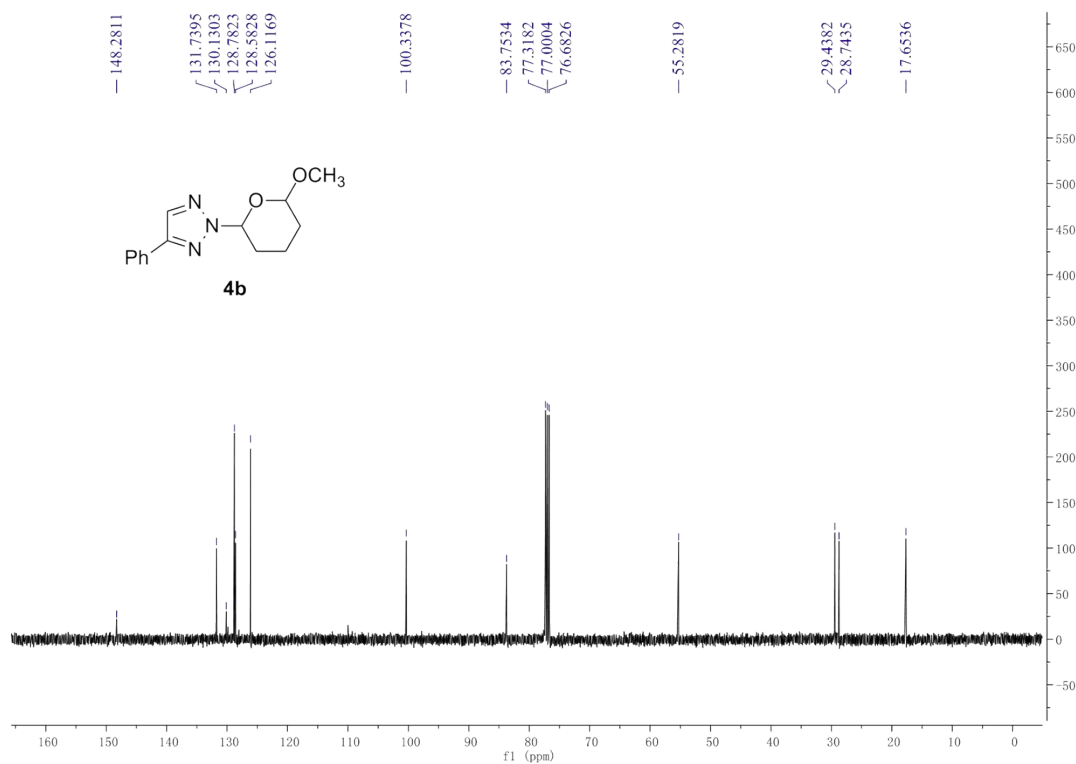

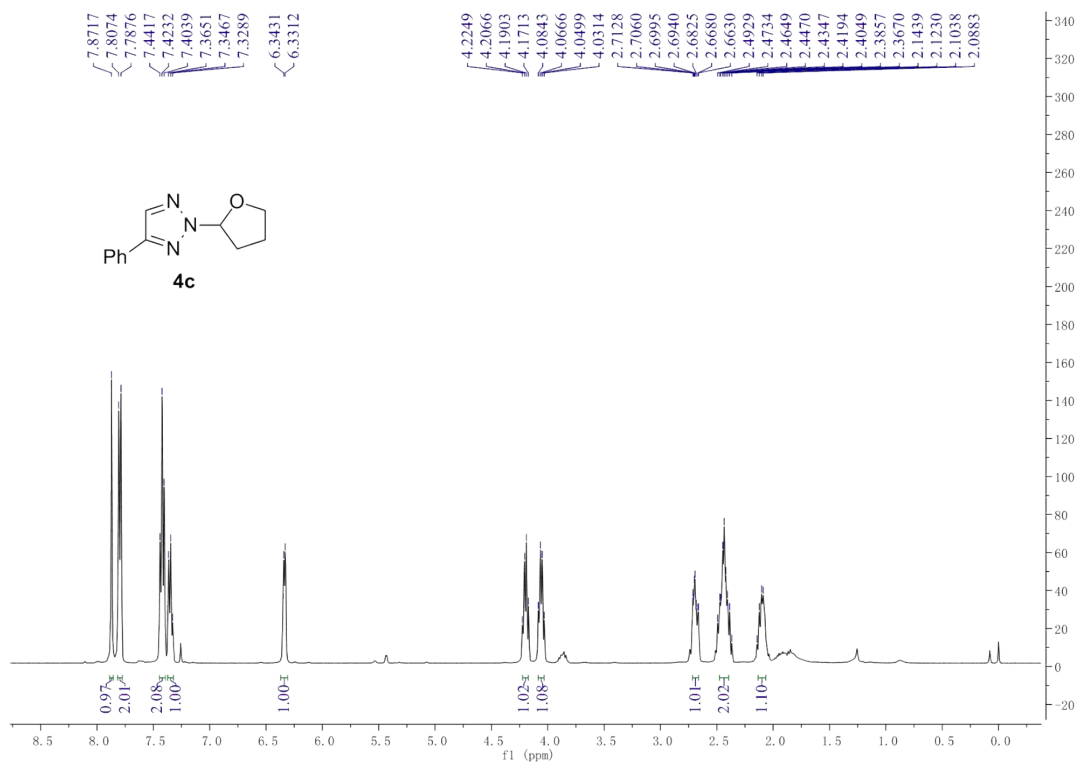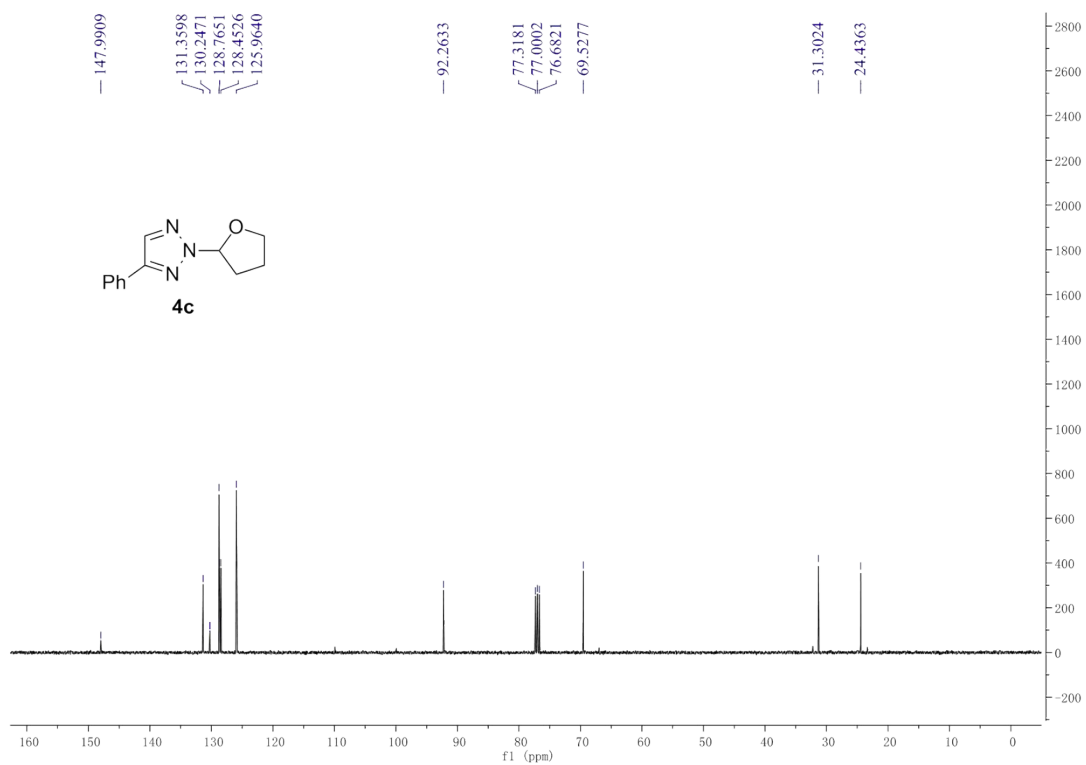

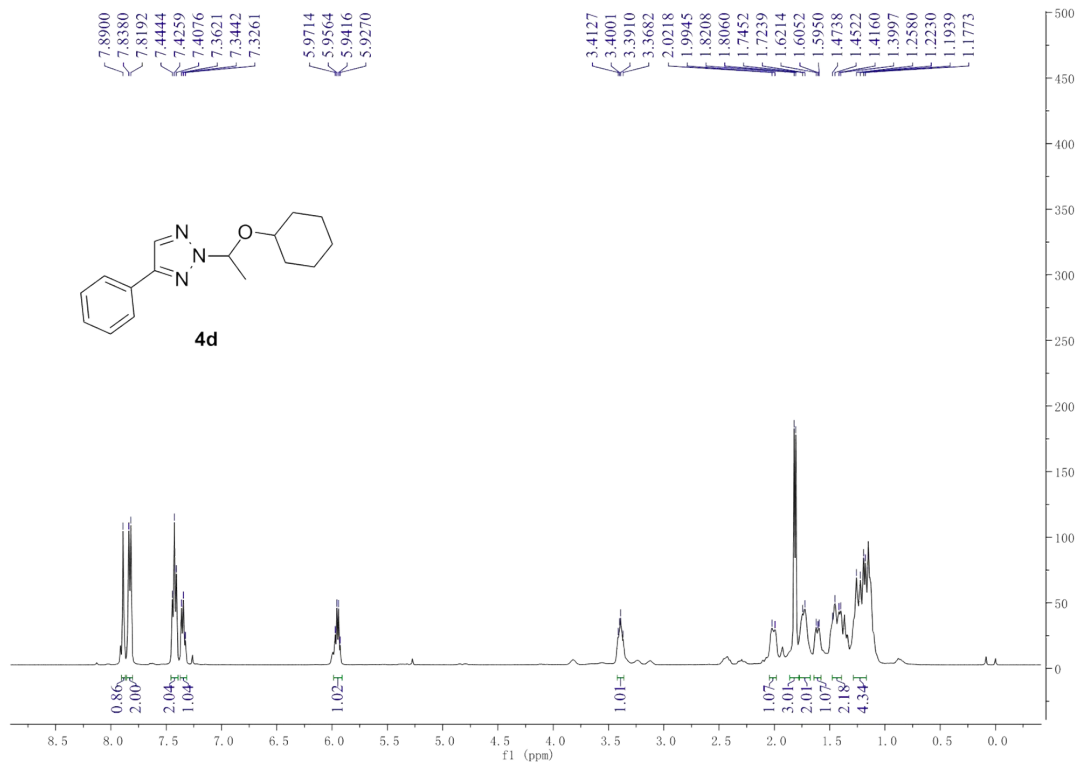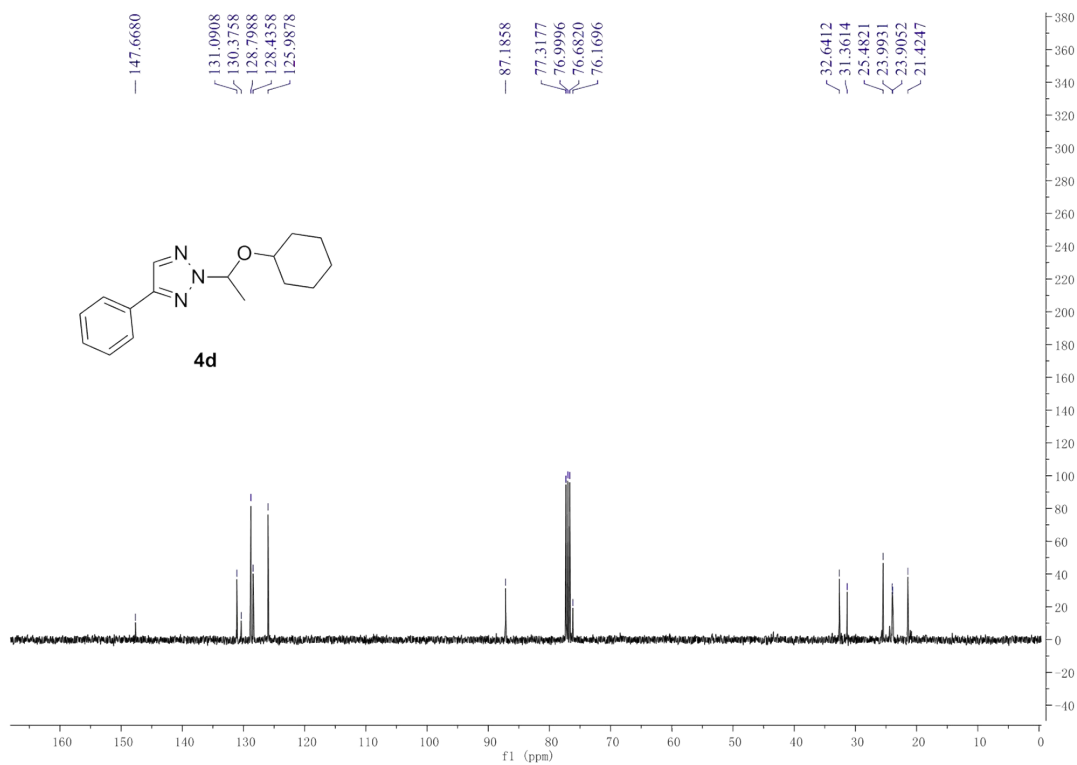

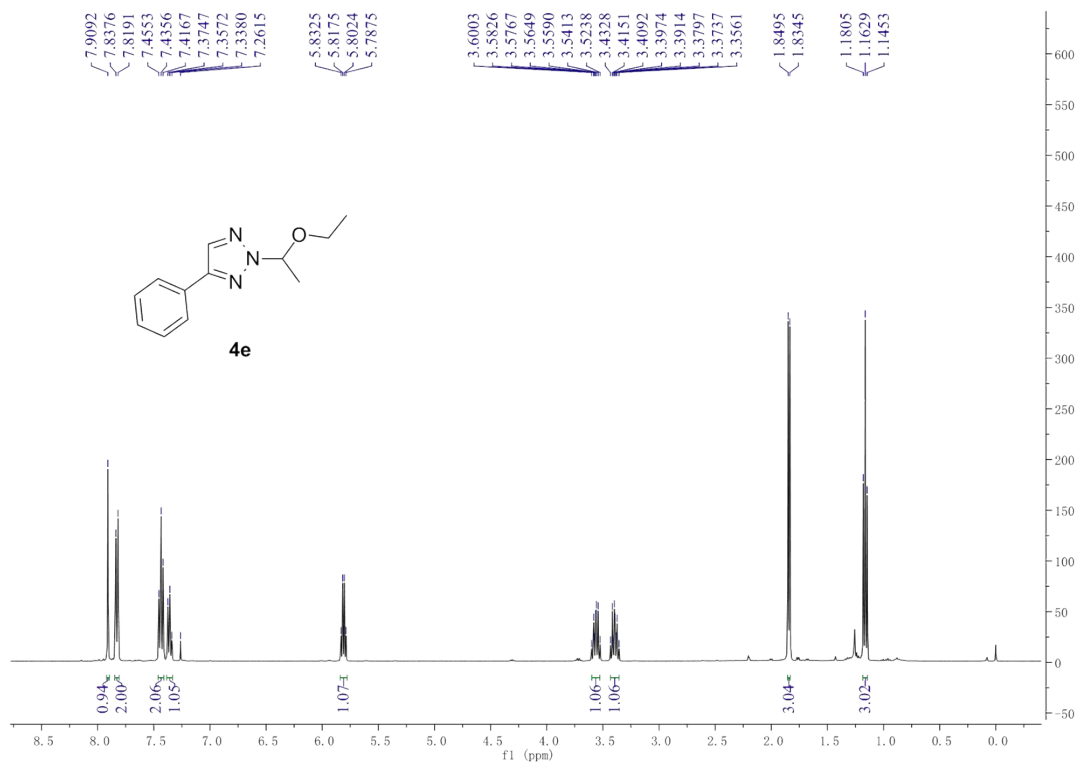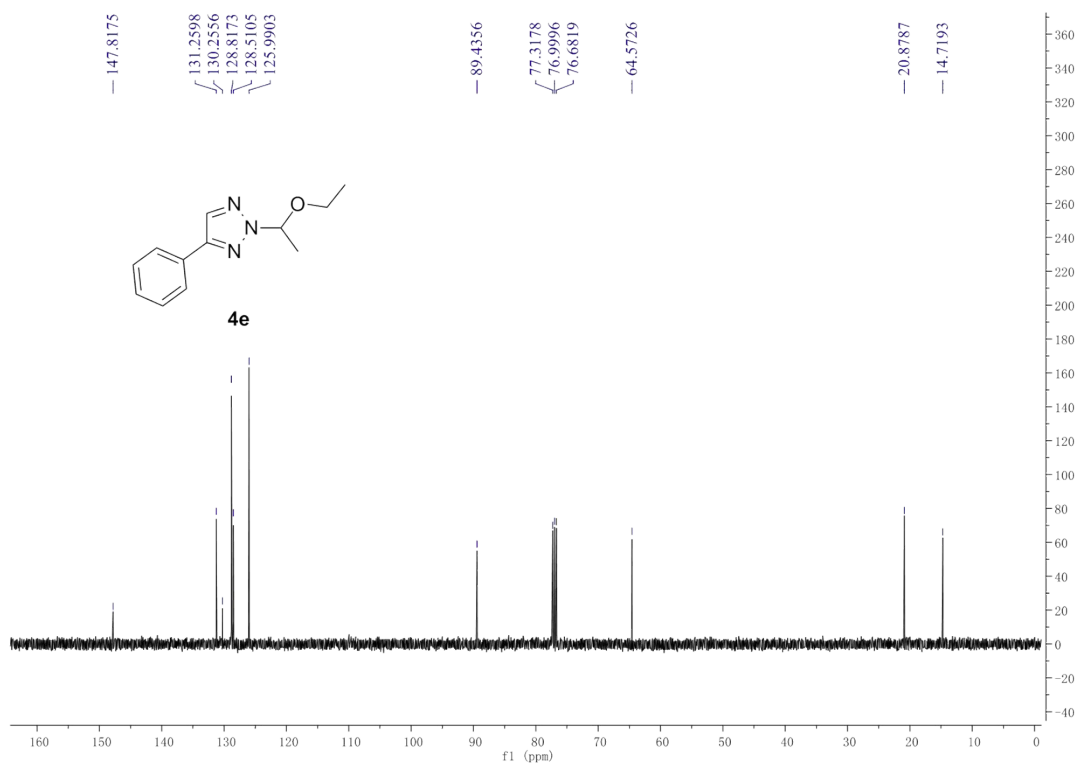

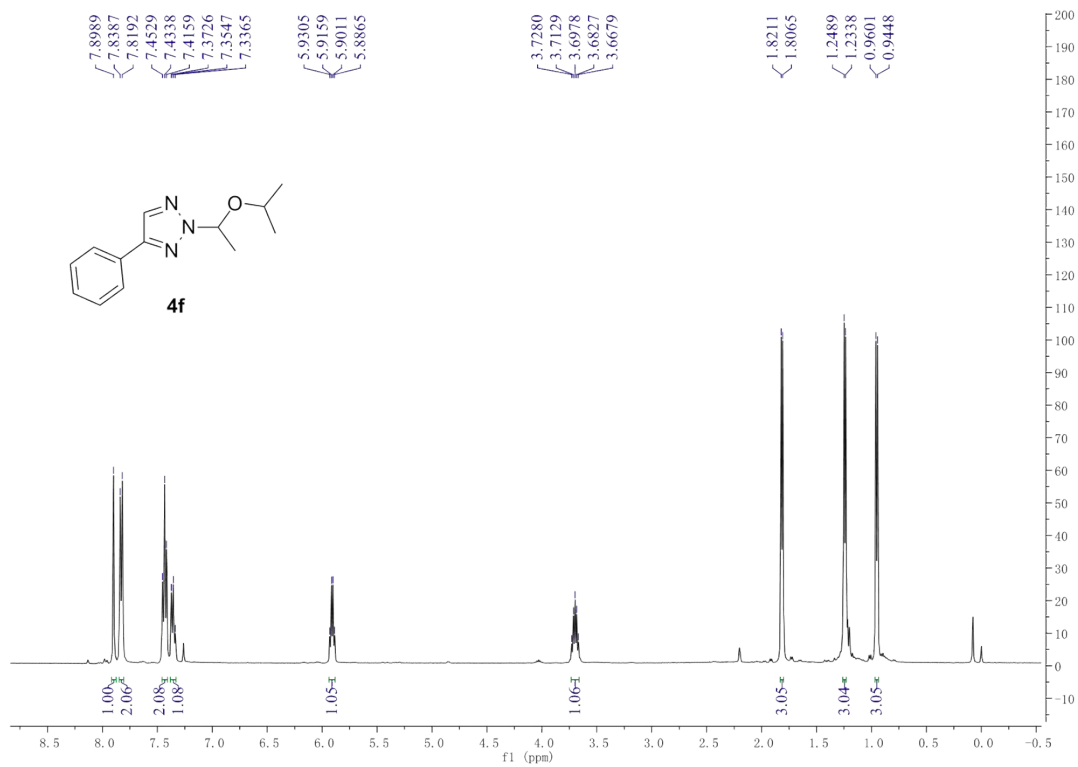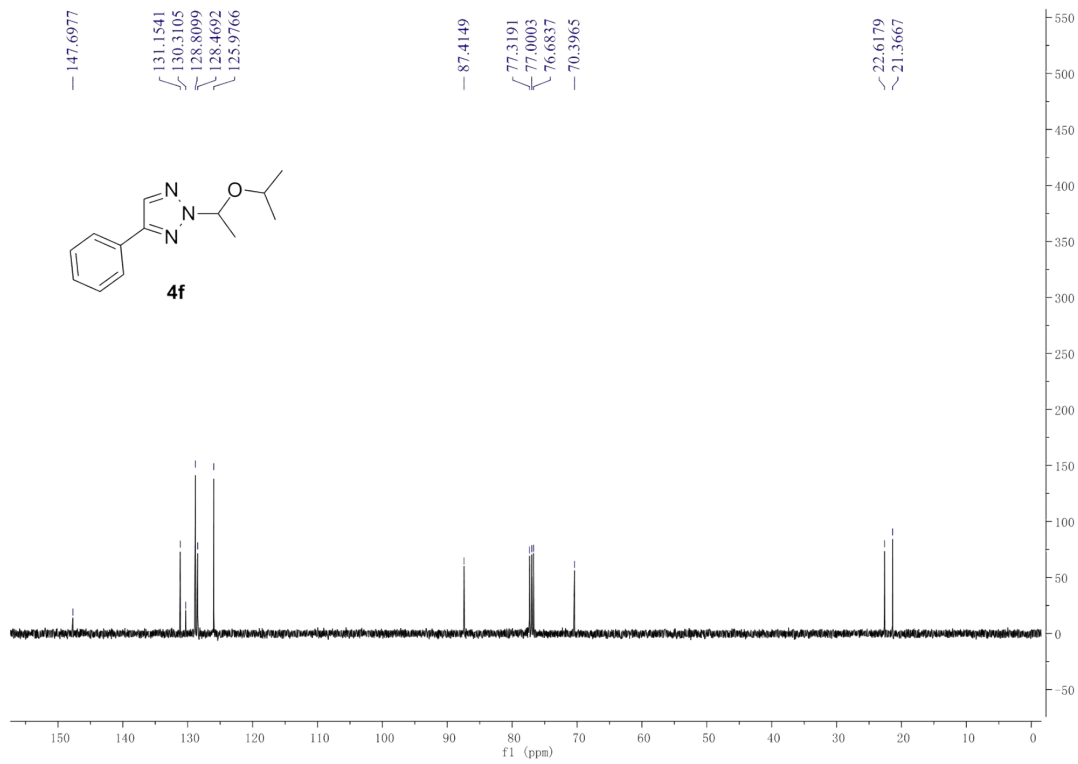

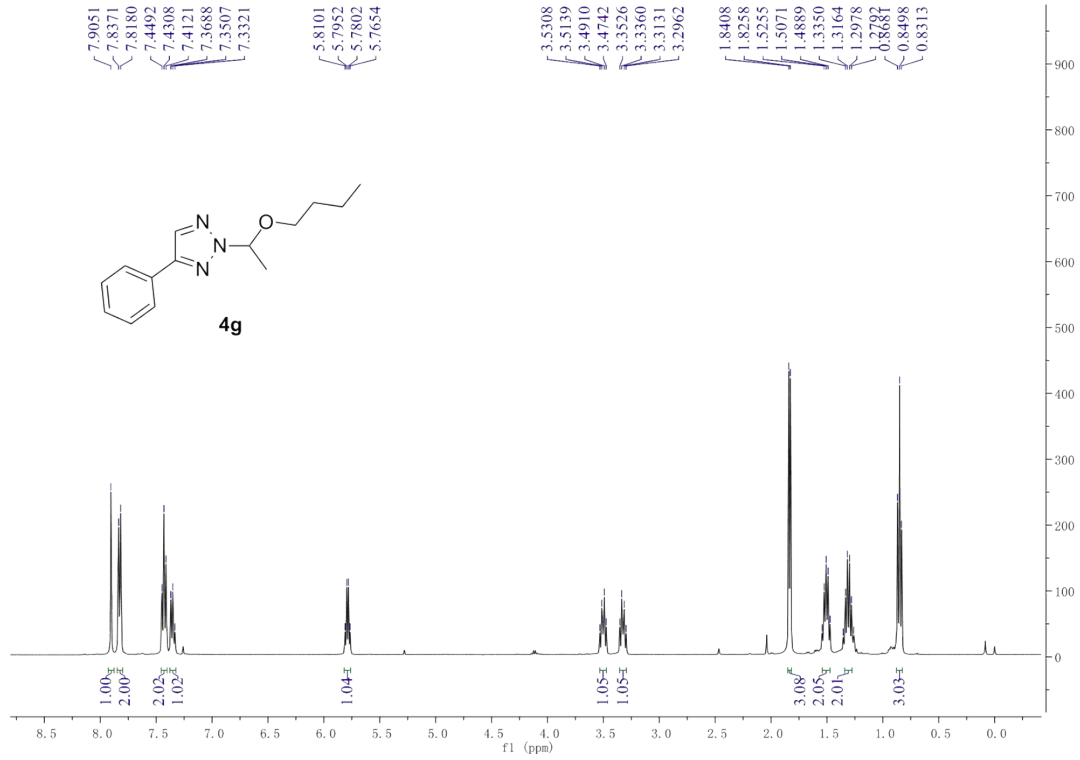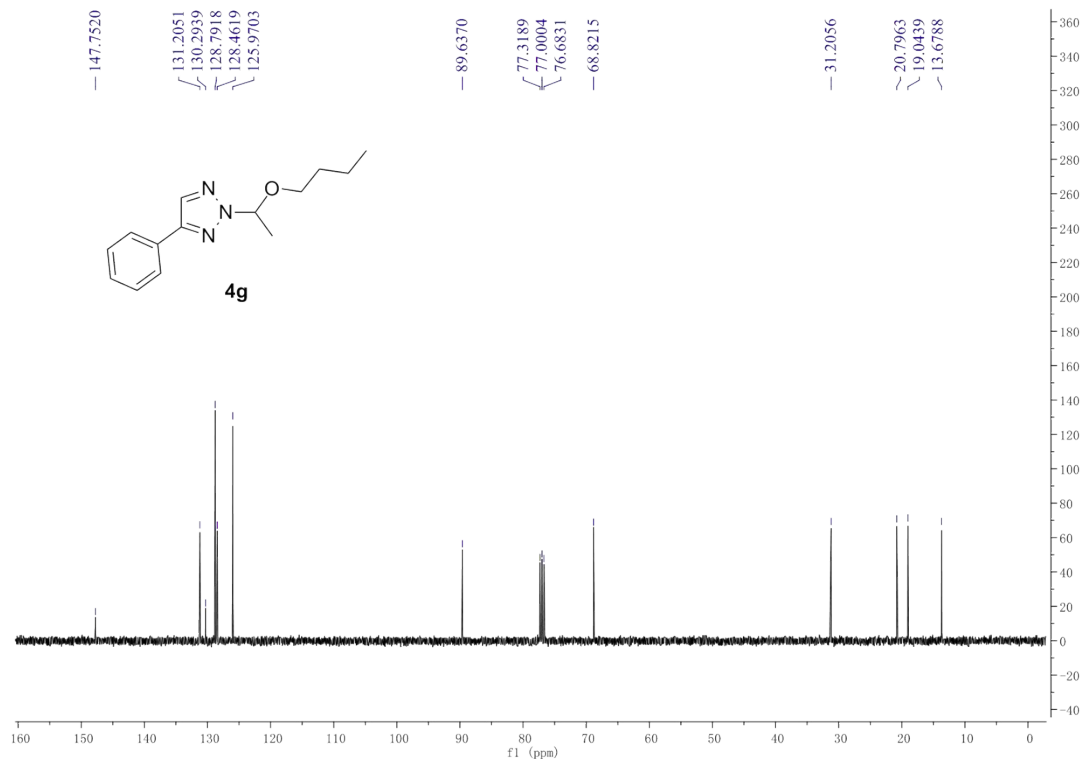

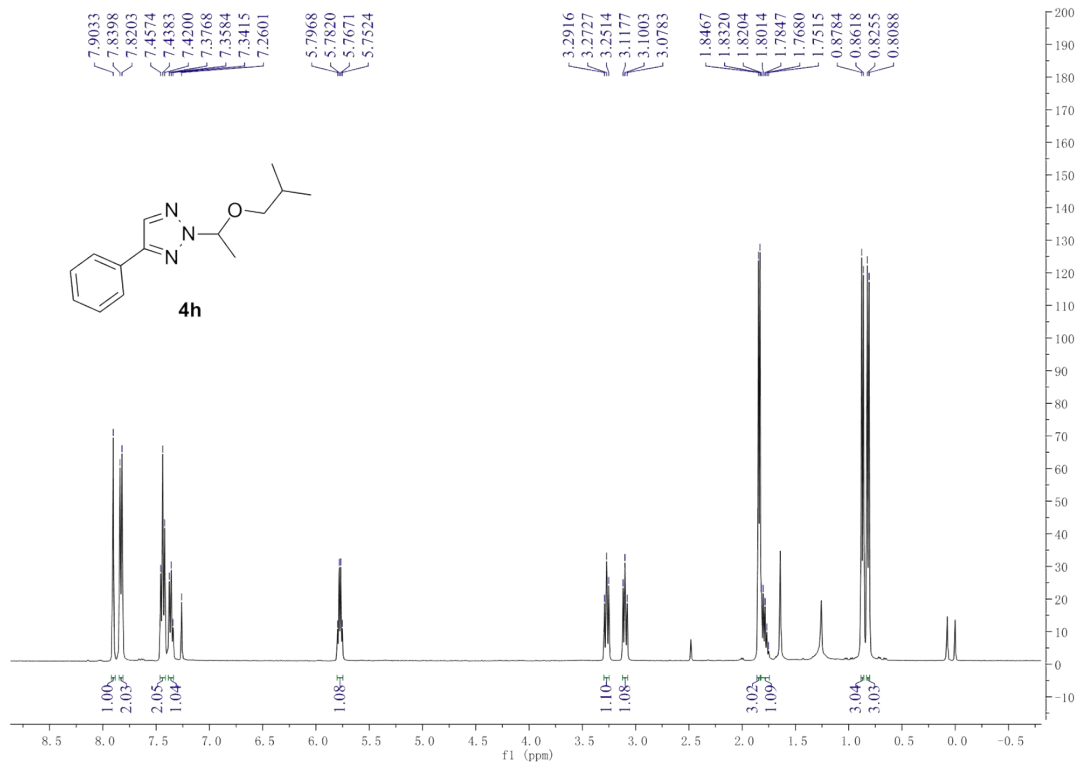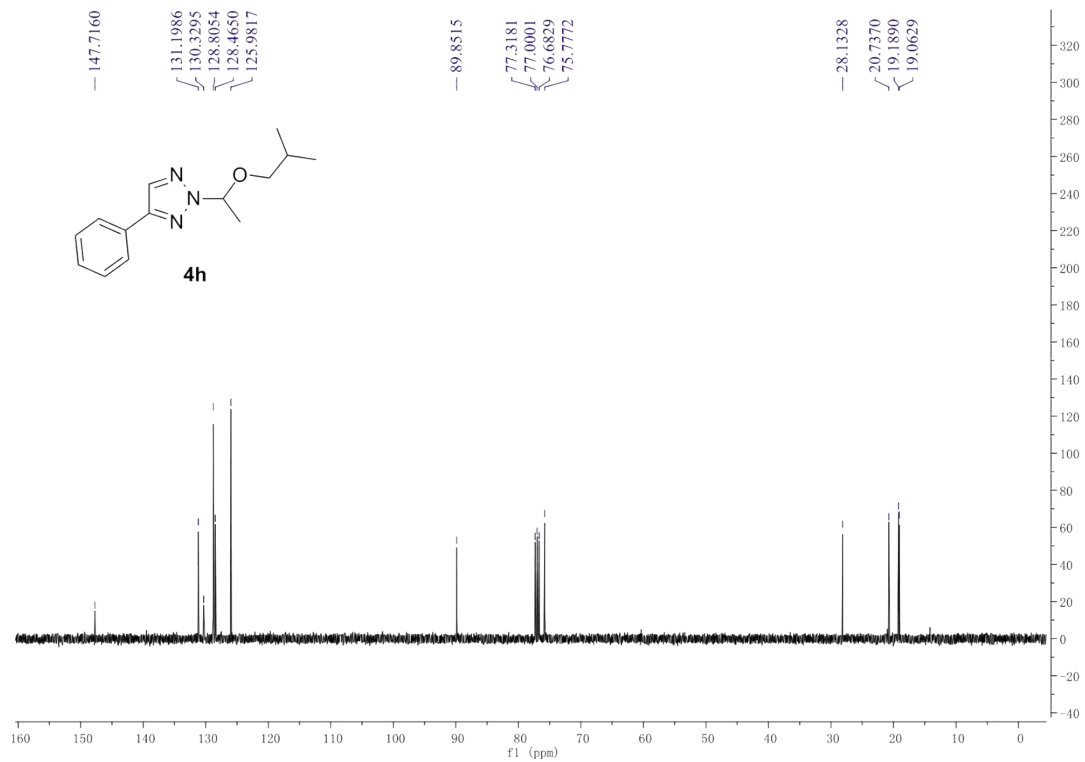

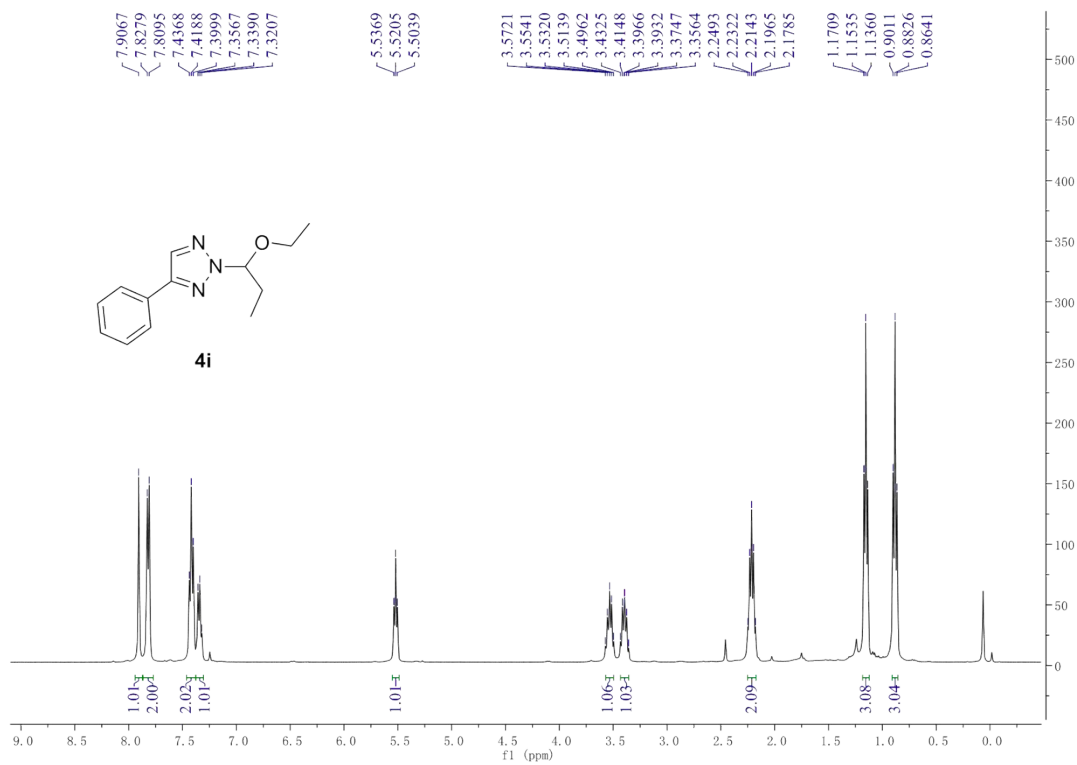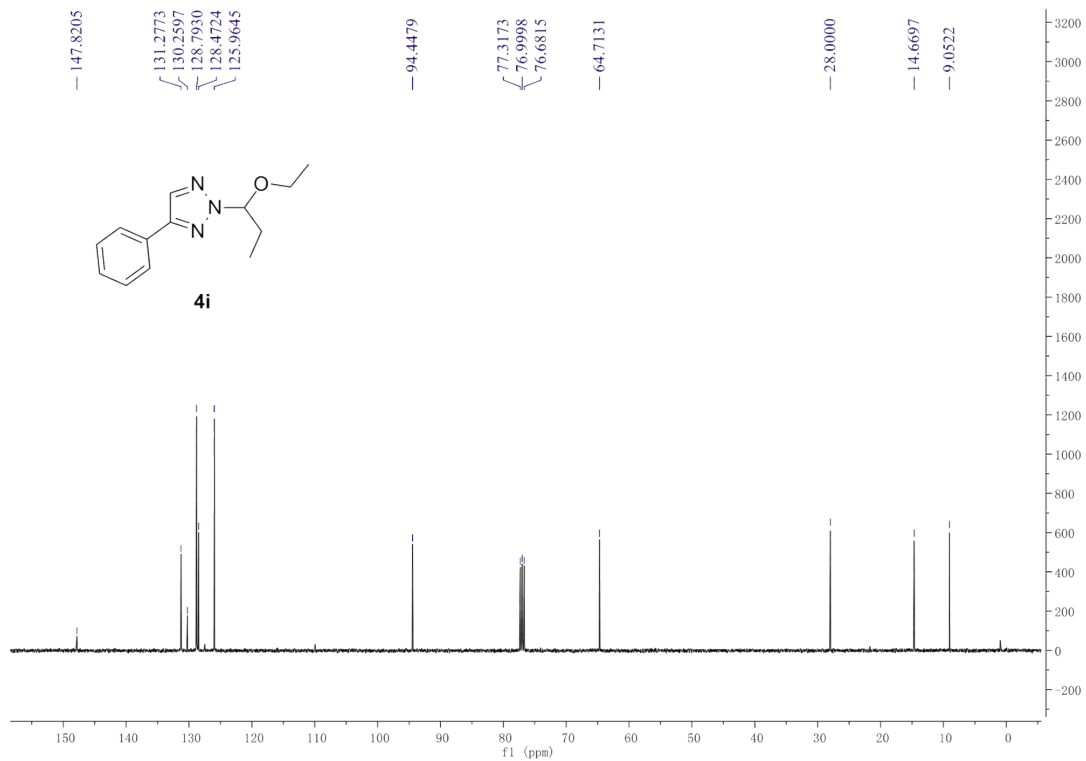



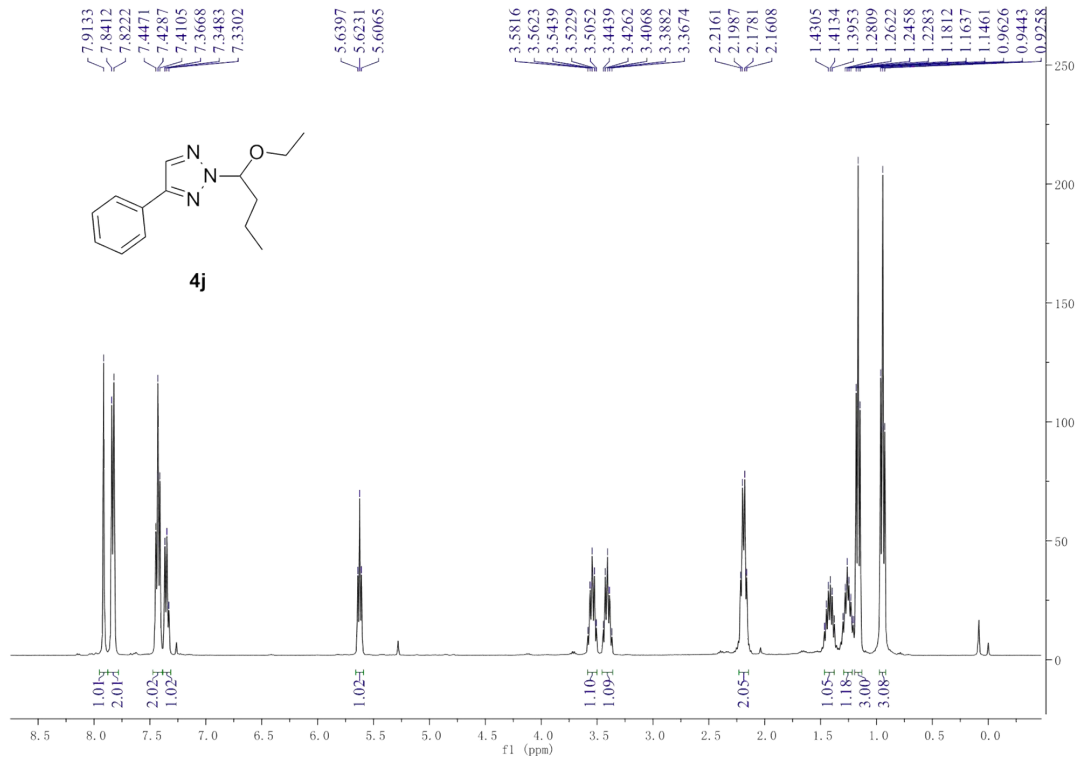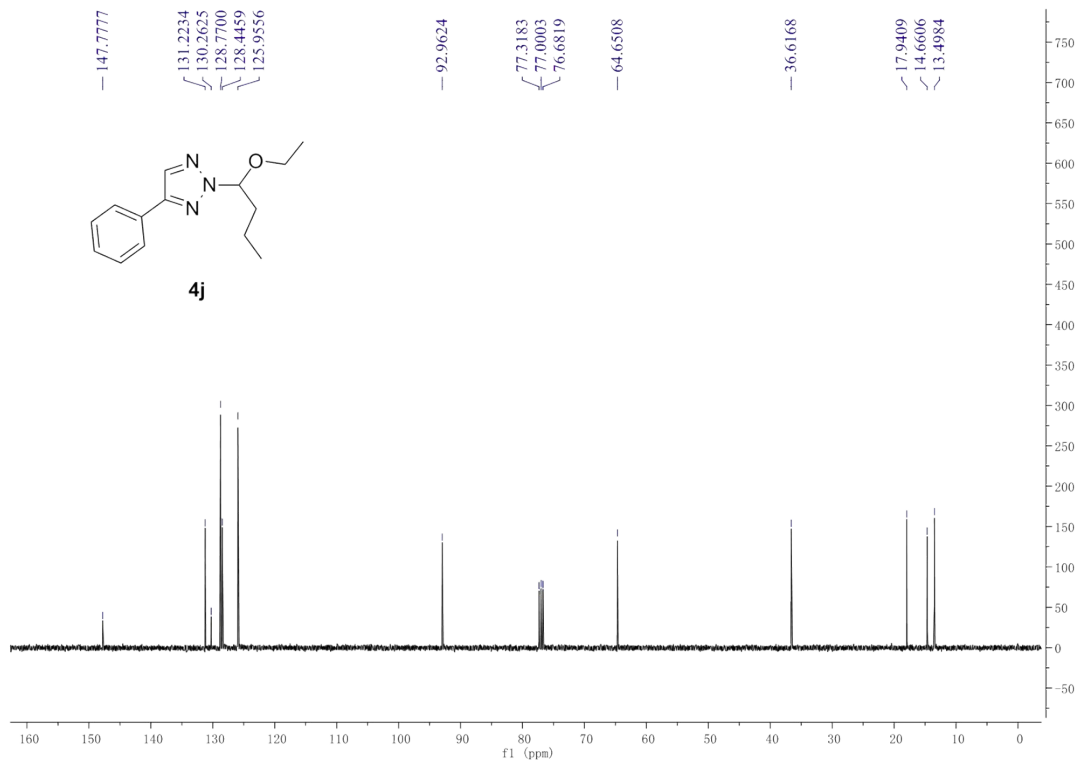

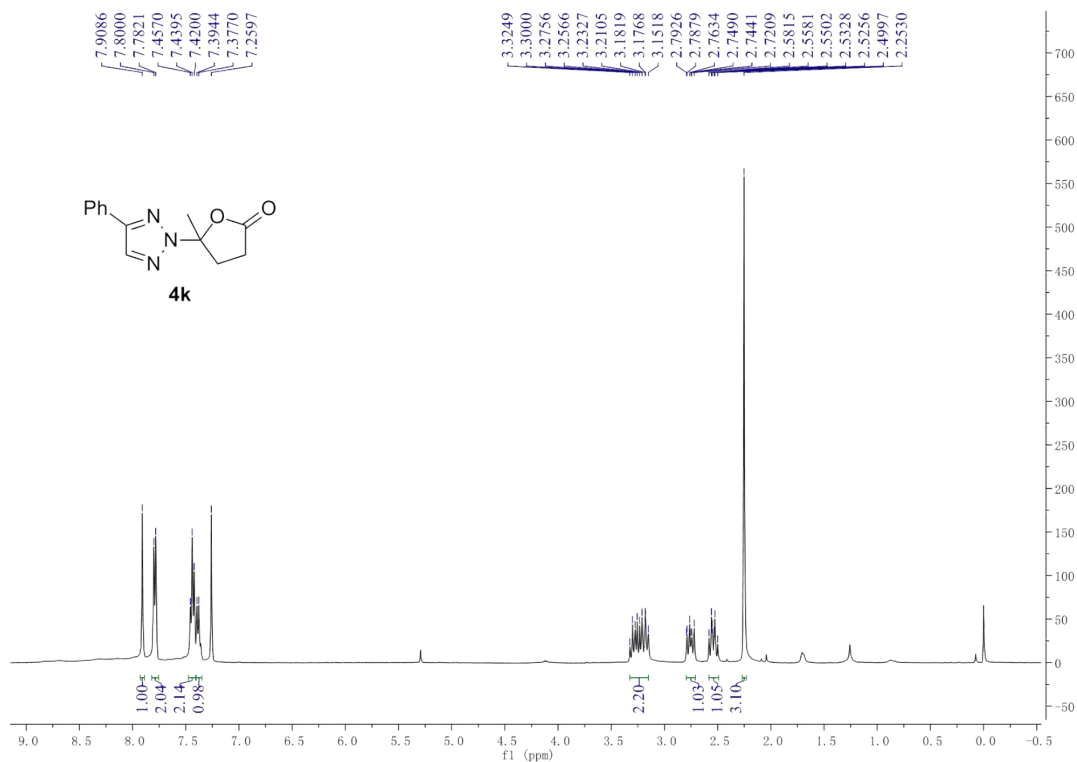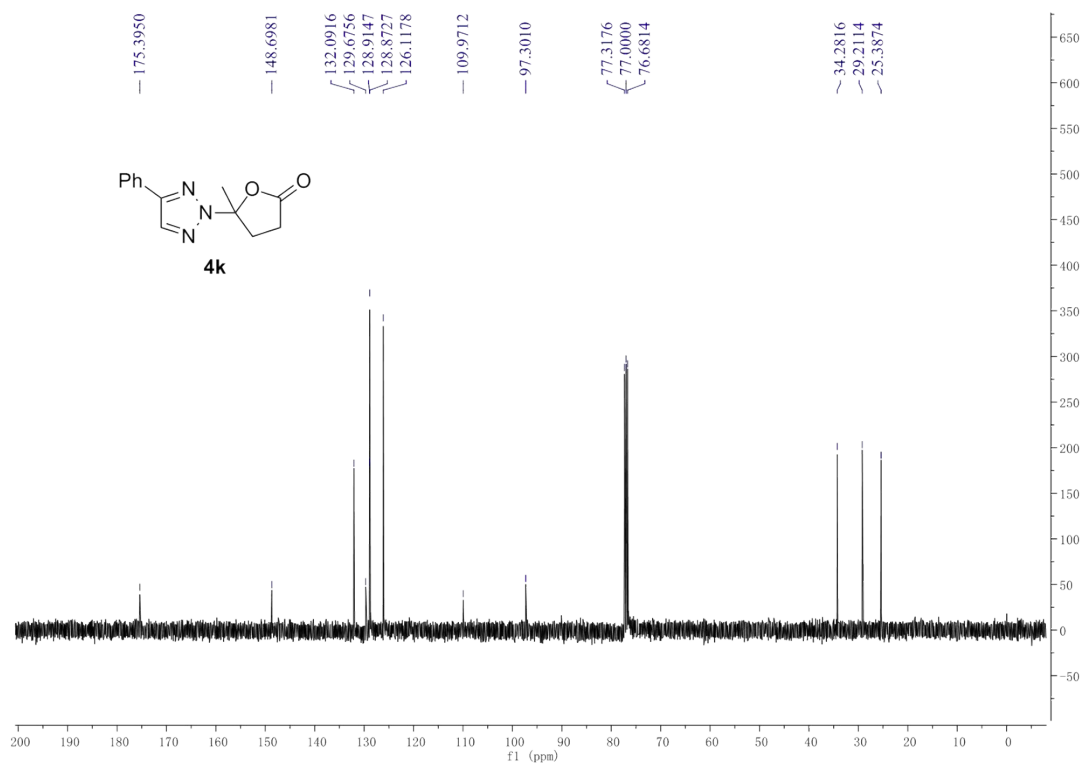

Supplement: c6ra26521a1.pdf [file c6ra26521a1.pdf]
